# Supplementary material for: Effects of proton tunneling distance on CO2 reduction by Mn terpyridine species
Source: Royal Society of Chemistry journal article supplement (doi:10.1039/d3dt02081a), 2023-01-01
Supplement: d3dt02081a1.pdf [file d3dt02081a1.pdf]

## *Supporting Information*

# **Effects of Proton Tunneling Distance on CO<sub>2</sub> Reduction by Mn Terpyridine Species**

*Yuhang Qing,<sup>a</sup> Qianqian Wu,<sup>a</sup> Shuanglin He,<sup>a</sup> Ping Zhang,<sup>a</sup> Ying Xiong,<sup>a</sup> Yaping  
Zhang,<sup>a</sup> Fang Huang,<sup>b</sup> Fei Li<sup>\*c</sup> and Lin Chen<sup>\*a</sup>*

[a] State Key Laboratory of Environment-Friendly Energy Material, School of Materials and Chemistry, Southwest University of Science and Technology, Mianyang 621010, P. R. China

[b] College of Chemistry, Chemical Engineering and Materials Science, Shandong Normal University, Jinan 250014, P. R. China

[c] State Key Laboratory of Fine Chemicals, Dalian University of Technology, Dalian 116024, P. R. China

### **Corresponding Authors**

Email\*: chenlin101101@aliyun.com

Email\*: fanghuang@sdu.edu.cn

Email\*: lifei@dlut.edu.cn

## Contents

|                                                                                    |    |
|------------------------------------------------------------------------------------|----|
| 1. Figure Contents.....                                                            | 3  |
| 2. Table Contents.....                                                             | 6  |
| 3. Scheme Contents.....                                                            | 7  |
| 4. Materials and Instruments.....                                                  | 8  |
| 5. Crystallographic Structure Determinations.....                                  | 9  |
| 6. Electrochemistry Study Details.....                                             | 12 |
| 7. Product Analysis .....                                                          | 14 |
| 8. Calculation for Faradaic Efficiency .....                                       | 15 |
| 9. Fourier-Transform Infrared Reflectance Spectroelectrochemistry (FTIR-SEC) ..... | 15 |
| 10. Experiment section.....                                                        | 16 |
| 11. DFT Calculations .....                                                         | 38 |

## 1. Figure Contents

|             |                                                                                                                                                                                                                                                                                                                                                                                                                                                                                                                                                                                                                                                                            |    |
|-------------|----------------------------------------------------------------------------------------------------------------------------------------------------------------------------------------------------------------------------------------------------------------------------------------------------------------------------------------------------------------------------------------------------------------------------------------------------------------------------------------------------------------------------------------------------------------------------------------------------------------------------------------------------------------------------|----|
| Figure S 1  | $^1\text{H}$ NMR (DMSO, 600 MHz) spectrum of <b>L</b> <sup>1</sup> .....                                                                                                                                                                                                                                                                                                                                                                                                                                                                                                                                                                                                   | 18 |
| Figure S 2  | $^1\text{H}$ NMR (DMSO, 600 MHz) spectrum of <b>L</b> <sup>2</sup> .....                                                                                                                                                                                                                                                                                                                                                                                                                                                                                                                                                                                                   | 19 |
| Figure S 3  | $^1\text{H}$ NMR (CDCl <sub>3</sub> , 600 MHz) spectrum of <b>L</b> <sup>3</sup> . ....                                                                                                                                                                                                                                                                                                                                                                                                                                                                                                                                                                                    | 21 |
| Figure S 4  | $^1\text{H}$ NMR (DMSO, 600 MHz) spectrum of <b>1p</b> . ....                                                                                                                                                                                                                                                                                                                                                                                                                                                                                                                                                                                                              | 23 |
| Figure S 5  | High resolution mass spectra of complex <b>1p</b> .....                                                                                                                                                                                                                                                                                                                                                                                                                                                                                                                                                                                                                    | 23 |
| Figure S 6  | $^1\text{H}$ NMR (DMSO, 600 MHz) spectrum of <b>2p</b> . ....                                                                                                                                                                                                                                                                                                                                                                                                                                                                                                                                                                                                              | 24 |
| Figure S 7  | High resolution mass spectra of complex <b>2p</b> .....                                                                                                                                                                                                                                                                                                                                                                                                                                                                                                                                                                                                                    | 25 |
| Figure S 8  | $^1\text{H}$ NMR (DMSO, 600 MHz) spectrum of <b>3</b> .....                                                                                                                                                                                                                                                                                                                                                                                                                                                                                                                                                                                                                | 26 |
| Figure S 9  | High resolution mass spectra of complex <b>3</b> . ....                                                                                                                                                                                                                                                                                                                                                                                                                                                                                                                                                                                                                    | 26 |
| Figure S 10 | Experimental FTIR spectra of <b>1p</b> (red line) , <b>2p</b> (blue line) and <b>3</b> (black line) recorded in KBr displaying characteristic $\nu\text{CO}$ stretching modes for their facial tricarbonyl geometries. ....                                                                                                                                                                                                                                                                                                                                                                                                                                                | 27 |
| Figure S 11 | CVs of 0.5 mM <b>1p</b> with varied concentrations of phenol under Ar. Voltammograms are taken at a scan rate of 100 mV/s with 0.1 M <sup>n</sup> Bu <sub>4</sub> NPF <sub>6</sub> in MeCN solution. Glassy carbon working electrode, Ag <sup>+</sup> /Ag reference electrode, and Pt wire counter electrode. ....                                                                                                                                                                                                                                                                                                                                                         | 27 |
| Figure S 12 | Proposed structure of the intermediate [ <b>1p</b> <sup>2-</sup> - Br <sup>-</sup> ].....                                                                                                                                                                                                                                                                                                                                                                                                                                                                                                                                                                                  | 28 |
| Figure S 13 | (a) CVs of complex <b>1p</b> (0.5 mM) with scan rate ( $\nu$ ) varied from 0.025 V/s to 10 V/s under Ar. (b) Plot of anodic peak current ( $i_p$ ) vs. $\nu^{1/2}$ for complex <b>1p</b> . (c) Cyclic voltammograms of complex <b>2p</b> (0.5 mM) with scan rate ( $\nu$ ) varied from 0.025 V/s to 10 V/s under Ar. (d) Plot of anodic peak current ( $i_p$ ) vs. $\nu^{1/2}$ for complex <b>2p</b> . Voltammograms are taken in MeCN solution with 0.1 M <sup>n</sup> Bu <sub>4</sub> NPF <sub>6</sub> as support electrolyte. Glassy carbon working electrode, Ag <sup>+</sup> /Ag reference electrode, and Pt wire counter electrode. ....                             | 28 |
| Figure S 14 | CVs of 0.5 mM <b>2p</b> with varied concentrations of phenol under Ar. Voltammograms are taken at a scan rate of 100 mV/s with 0.1 M <sup>n</sup> Bu <sub>4</sub> NPF <sub>6</sub> in MeCN solution. Glassy carbon working electrode, Ag <sup>+</sup> /Ag reference electrode, and Pt wire counter electrode.....                                                                                                                                                                                                                                                                                                                                                          | 29 |
| Figure S 15 | CVs show 0.5 mM <b>1p</b> with varied amounts of phenol under Ar, and saturating with CO <sub>2</sub> in the presence of 1 M phenol. Voltammograms are taken at a scan rate of 100 mV/s with 0.1 M <sup>n</sup> Bu <sub>4</sub> NPF <sub>6</sub> in MeCN solution. Glassy carbon working electrode, Ag <sup>+</sup> /Ag reference electrode, and Pt wire counter electrode. ....                                                                                                                                                                                                                                                                                           | 29 |
| Figure S 16 | CVs show 0.5 mM <b>2p</b> with varied amounts of phenol under Ar, and saturating with CO <sub>2</sub> in the presence of 1 M phenol. Voltammograms are taken at a scan rate of 100 mV/s with 0.1 M <sup>n</sup> Bu <sub>4</sub> NPF <sub>6</sub> in MeCN solution. Glassy carbon working electrode, Ag <sup>+</sup> /Ag reference electrode, and Pt wire counter electrode. ....                                                                                                                                                                                                                                                                                           | 30 |
| Figure S 17 | (a) CVs show 0.5 mM <b>1p</b> with varied amounts of PhOH under CO <sub>2</sub> . (b) The linear dependence of catalytic Current ( $i_{\text{cat}}$ ) on the square root of the concentration of PhOH. (c) Cyclic voltammograms show 0.5 mM <b>2p</b> with varied amounts of PhOH under CO <sub>2</sub> . (d) The linear dependence of catalytic Current ( $i_{\text{cat}}$ ) on the square root of the concentration of PhOH. Voltammograms are taken at a scan rate of 100 mV/s with 0.1 M <sup>n</sup> Bu <sub>4</sub> NPF <sub>6</sub> in MeCN solution. Glassy carbon working electrode, Ag <sup>+</sup> /Ag reference electrode, and Pt wire counter electrode. .... | 31 |

|                                                                                                                                                                                                                                                                                                                                                                                                                                                                                                                                                                                                                                                                                                                                                                                                                                                                                                                                                                                                                                                                                                                                                                                                                                                                                                                                                 |    |
|-------------------------------------------------------------------------------------------------------------------------------------------------------------------------------------------------------------------------------------------------------------------------------------------------------------------------------------------------------------------------------------------------------------------------------------------------------------------------------------------------------------------------------------------------------------------------------------------------------------------------------------------------------------------------------------------------------------------------------------------------------------------------------------------------------------------------------------------------------------------------------------------------------------------------------------------------------------------------------------------------------------------------------------------------------------------------------------------------------------------------------------------------------------------------------------------------------------------------------------------------------------------------------------------------------------------------------------------------|----|
| Figure S 18 (a) CVs of <b>1p</b> (0–0.481 mM) in the presence of 1 M PhOH under CO <sub>2</sub> . (b) The linear dependence of catalytic Current ( <i>i</i> <sub>cat</sub> ) on the concentration of the catalyst. Voltammograms are taken at a scan rate of 100 mV/s with 0.1 M <sup>n</sup> Bu <sub>4</sub> NPF <sub>6</sub> in MeCN solution. Glassy carbon working electrode, Ag <sup>+</sup> /Ag reference electrode, and Pt wire counter electrode .....                                                                                                                                                                                                                                                                                                                                                                                                                                                                                                                                                                                                                                                                                                                                                                                                                                                                                  | 32 |
| Figure S 19 (a) CVs of <b>2p</b> (0–0.481 mM) in the presence of 1 M PhOH under CO <sub>2</sub> . (b) The linear dependence of catalytic Current ( <i>i</i> <sub>cat</sub> ) on the concentration of the catalyst. Voltammograms are taken at a scan rate of 100 mV/s with 0.1 M <sup>n</sup> Bu <sub>4</sub> NPF <sub>6</sub> in MeCN solution. Glassy carbon working electrode, Ag <sup>+</sup> /Ag reference electrode, and Pt wire counter electrode. ....                                                                                                                                                                                                                                                                                                                                                                                                                                                                                                                                                                                                                                                                                                                                                                                                                                                                                  | 32 |
| Figure S 20 (a) Cyclic voltammogram show <b>3</b> (0.5 mM) under Ar with a scan rate of 100 mV/s. (b) CVs of 0.5 mM <b>3</b> under Ar (black), in the presence of 1 mM phenol (blue) and saturated with CO <sub>2</sub> in the presence of 1 M phenol (red). Voltammograms are taken at a scan rate of 100 mV/s with 0.1 M <sup>n</sup> Bu <sub>4</sub> NPF <sub>6</sub> in MeCN solution. Glassy carbon working electrode, Ag <sup>+</sup> /Ag reference electrode, and Pt wire counter electrode. (c) IR-SEC of a 1mM solution of <b>3</b> in MeCN under Ar. Reduction at the potential corresponding to the first peak current. ....                                                                                                                                                                                                                                                                                                                                                                                                                                                                                                                                                                                                                                                                                                         | 33 |
| Figure S 21 (a) CVs of 0.5 mM <b>1p</b> under Ar in the absence of phenol (black line), under CO <sub>2</sub> in the presence of 1 M phenol (red line). Voltammograms are taken at a scan rate of 100 mV/s with 0.1 M <sup>n</sup> Bu <sub>4</sub> NPF <sub>6</sub> in MeCN solution. (b) Cyclic voltammetry of <b>1p</b> (red line) and <b>2p</b> (blue line) in the potential domain of the catalytic CO <sub>2</sub> reduction wave in acetonitrile + 0.1 M <sup>n</sup> Bu <sub>4</sub> NPF <sub>6</sub> + 1 M PhOH, at 0.1 V/s under 1 atm. CO <sub>2</sub> (catalyst concentration is 0.5 mM). The current, <i>i</i> <sub>cat</sub> is normalized against the peak current of the reversible one-electron reversible wave, <i>i</i> <sub>p</sub> obtained at the same scan rate (0.1 V/s). (c) Foot-of-the-wave analysis of <b>1p</b> and <b>2p</b> under equivalent experimental conditions with a linear fit extrapolated from ( <i>E</i> – <i>E</i> <sub>cat</sub> ) at a scan rates of 0.1 V/s. ....                                                                                                                                                                                                                                                                                                                                  | 34 |
| Figure S 22 (a) Controlled potential electrolysis at -1.75 V and -1.85 V vs. Fc <sup>+0</sup> in the presence and absence of 0.5 mM <b>1p</b> (or <b>2p</b> ) under CO <sub>2</sub> in the presence of 1 M phenol. (b) Cyclic voltammograms show 0.5 mM <b>1p</b> and <b>2p</b> before and after electrolysis at -1.85 V vs. Fc <sup>+0</sup> under CO <sub>2</sub> in the presence of 1 M phenol. (c) The charge integration after electrolysis for <b>1p</b> and <b>2p</b> (d) The gas products channel of <b>1p</b> . (e) Controlled potential electrolysis at -1.56 V vs. Fc <sup>+0</sup> under CO <sub>2</sub> in the presence of 1 M phenol in the presence and absence of 0.5 mM <b>1p</b> (or <b>2p</b> ). (f) Mass spectrum of the gaseous phase resulting from electrolysis of the <sup>13</sup> CO <sub>2</sub> saturated solution containing 0.5 mM <b>1p</b> at -1.85 V over 0.5 h and (g) 1 h. Conditions: 0.1 M TBAPF <sub>6</sub> in CH <sub>3</sub> CN with 1 M phenol, glassy carbon working electrode, graphite rod counter electrode, Ag <sup>+</sup> /Ag reference electrode. Voltammograms are taken at a scan rate of 100 mV/s with 0.1 M <sup>n</sup> Bu <sub>4</sub> NPF <sub>6</sub> in MeCN solution. Glassy carbon working electrode, Ag <sup>+</sup> /Ag reference electrode, and Pt wire counter electrode. .... | 36 |
| Figure S 23 Gibbs free energy (kcal mol <sup>-1</sup> ) profile for the electrochemical reduction of CO <sub>2</sub> to CO catalyzed by <b>1</b> (green line) or <b>2</b> (red line) at -1.85 V vs Fc <sup>+0</sup> . ....                                                                                                                                                                                                                                                                                                                                                                                                                                                                                                                                                                                                                                                                                                                                                                                                                                                                                                                                                                                                                                                                                                                      | 44 |
| Figure S 24 Optimized geometries of <b>1-6</b> and <b>2-6</b> for the proton tunneling distance for C-OH bond cleavage. Bond lengths are shown in Angstroms. ....                                                                                                                                                                                                                                                                                                                                                                                                                                                                                                                                                                                                                                                                                                                                                                                                                                                                                                                                                                                                                                                                                                                                                                               | 45 |
| Figure S 25 Optimized geometries of <b>1-2</b> and <b>2-2</b> for the proton tunneling distance for CO <sub>2</sub> binding. Bond lengths are shown in Angstroms. ....                                                                                                                                                                                                                                                                                                                                                                                                                                                                                                                                                                                                                                                                                                                                                                                                                                                                                                                                                                                                                                                                                                                                                                          | 46 |
| Figure S26 IR-SEC of 0.5 mM <b>1p</b> (left) and <b>2p</b> (left) in the presence of 0.5 M phenol under CO <sub>2</sub>                                                                                                                                                                                                                                                                                                                                                                                                                                                                                                                                                                                                                                                                                                                                                                                                                                                                                                                                                                                                                                                                                                                                                                                                                         |    |

atmosphere with varied electrolysis potential. The resting species **1p** (or **2p**) (black line), the final species after electrolysis at an applied electrolysis potential (red line). .....47  
Figure S 27 Optimized geometries of **1b** and **2b** for the interaction of the bound CO<sub>2</sub> molecule with intramolecular amide. Bond lengths are shown in Angstroms.....48

## 2. Table Contents

|                                                                                                           |    |
|-----------------------------------------------------------------------------------------------------------|----|
| Table S 1 Bond lengths [ $\text{\AA}$ ] for <b>1p</b> .....                                               | 9  |
| Table S 2 Bond Angle for <b>1p</b> .....                                                                  | 10 |
| Table S 3 Crystal data and structure refinement for <b>1p</b> .....                                       | 11 |
| Table S 4 Quantitative analysis of the CPE results of <b>1p</b> and <b>2p</b> .....                       | 39 |
| Table S 5 Comparison of the electrocatalytic properties of complex <b>1p</b> , <b>2p</b> . .....          | 39 |
| Table S6 Selected experimental and calculated $\nu_{CO}$ for the proposed intermediates in pure MeCN..... | 42 |

### 3. Scheme Contents

|            |                                                                                                                                                                                                                                  |    |
|------------|----------------------------------------------------------------------------------------------------------------------------------------------------------------------------------------------------------------------------------|----|
| Scheme S 1 | preparation of target ligands <b>L<sup>1</sup></b> .....                                                                                                                                                                         | 17 |
| Scheme S 2 | preparation of target ligands <b>L<sup>2</sup></b> .....                                                                                                                                                                         | 18 |
| Scheme S 3 | preparation of target ligands <b>L<sup>3</sup></b> .....                                                                                                                                                                         | 20 |
| Scheme S 4 | preparation of target complex <b>1p</b> .....                                                                                                                                                                                    | 22 |
| Scheme S 5 | preparation of target complex <b>2p</b> .....                                                                                                                                                                                    | 24 |
| Scheme S 6 | preparation of target complex <b>3</b> .....                                                                                                                                                                                     | 25 |
| Scheme S 7 | Speculative electrocatalytic cycle for the reduction of CO <sub>2</sub> to CO mediated by <b>[1<sup>2-</sup>-Br<sup>-</sup>] (1a)</b> or <b>[2<sup>2-</sup>-Br<sup>-</sup>] (2a)</b> at -1.85 V vs <i>Fc</i> <sup>+0</sup> ..... | 43 |

#### 4. Materials and Instruments

All manipulations for preparation and handling of organometallic complexes were carried out under air. All the solvents were used as received. Other commercially available chemicals such as  $\text{Mn}(\text{CO})_5\text{Br}$ ,  $\text{Pd}(\text{PPh}_3)_4$ , benzaldehyde, 1-(pyridin-2-yl)ethanone, potassium hydroxide, pyridine, Toluene, potassium carbonate, anhydrous methanol and iodine were purchased from local suppliers and used as received. Water was deionized with the Millipore Milli-Q UF Plus system. Glass carbon disc (3 mm),  $\text{Ag}^+/\text{Ag}$  electrode and platinum wire were purchased from CHI for electrochemical studies.

NMR Spectra were collected with a varian INOVA 600 NMR spectrometer. Mass spectra were recorded with HP 1100 HPL/ESI-DAD-MS and Waters/Micromass LC/Q-TOF-MS instruments. Elemental analyses were performed with a Thermoquest-Flash EA 1112 elemental analyzer.



## 5. Crystallographic Structure Determinations

The single-crystal X-ray diffraction data were collected with an Bruker Smart Apex II CCD diffractometer with a graphite-monochromated Mo-*K* radiation (= 0.071073 Å) at 100 K using the  $\theta$ -2 scan mode. Data processing was accomplished with the SAINT processing program. Intensity data were corrected for absorption by the SADABS program. All structures were solved by direct methods and refined on  $F^2$  against full-matrix least-squares methods by using the SHELXTL 97 program package. All non-hydrogen atoms were refined anisotropically. Hydrogen atoms were located by geometrical calculation. Crystallographic data and selected bond lengths and angles for **1p** are given in Tables S1–S3. **CCDC-2038280** contain the supplementary crystallographic data for this paper. These data can be obtained free of charge from The Cambridge Crystallographic Data Centre via [http://www.ccdc.cam.ac.uk/data\\_request/cif](http://www.ccdc.cam.ac.uk/data_request/cif).

Table S 1 Bond lengths [Å] for **1p**

| Atom | Atom | Length/Å   | Atom | Atom | Length/Å  |
|------|------|------------|------|------|-----------|
| Br1  | Mn1  | 2.4367(12) | C9   | C10  | 1.394(8)  |
| Mn1  | N3   | 2.085(4)   | C10  | C11  | 1.388(7)  |
| Mn1  | N4   | 2.039(4)   | C11  | C12  | 1.490(7)  |
| Mn1  | C28  | 1.797(6)   | C12  | C13  | 1.376(7)  |
| Mn1  | C29  | 1.781(6)   | C13  | C14  | 1.402(8)  |
| Mn1  | C30  | 1.810(5)   | C14  | C15  | 1.391(8)  |
| O1   | C31  | 1.230(6)   | C14  | C17  | 1.485(8)  |
| O2   | C30  | 1.152(6)   | C15  | C16  | 1.377(8)  |
| O3   | C29  | 1.162(6)   | C16  | C23  | 1.477(8)  |
| O4   | C28  | 1.151(7)   | C17  | C18  | 1.400(9)  |
| N1   | C1   | 1.426(6)   | C17  | C22  | 1.338(10) |
| N1   | C31  | 1.352(6)   | C18  | C19  | 1.407(11) |
| N2   | C7   | 1.341(6)   | C19  | C20  | 1.411(15) |
| N2   | C11  | 1.342(7)   | C20  | C21  | 1.350(14) |
| N3   | C12  | 1.361(6)   | C21  | C22  | 1.392(10) |
| N3   | C16  | 1.363(6)   | C23  | C24  | 1.397(7)  |
| N4   | C23  | 1.346(7)   | C24  | C25  | 1.402(10) |
| N4   | C27  | 1.339(7)   | C25  | C26  | 1.350(11) |
| C1   | C2   | 1.403(7)   | C26  | C27  | 1.376(8)  |
| C1   | C6   | 1.366(8)   | C31  | C32  | 1.503(7)  |
| C2   | C3   | 1.384(7)   | C32  | C33  | 1.383(7)  |
| C2   | C7   | 1.467(8)   | C32  | C37  | 1.398(7)  |
| C3   | C4   | 1.381(9)   | C33  | C34  | 1.389(8)  |

|    |    |          |     |     |          |
|----|----|----------|-----|-----|----------|
| C4 | C5 | 1.377(9) | C34 | C35 | 1.368(7) |
| C5 | C6 | 1.375(8) | C35 | C36 | 1.372(8) |
| C7 | C8 | 1.417(7) | C36 | C37 | 1.394(8) |
| C8 | C9 | 1.356(9) |     |     |          |

Table S 2 Bond Angle for **1p**

| Atom | Atom | Atom | Angle/°    | Atom | Atom | Atom | Angle/°   |
|------|------|------|------------|------|------|------|-----------|
| N3   | Mn1  | Br1  | 85.92(12)  | C10  | C11  | C12  | 119.5(5)  |
| N4   | Mn1  | Br1  | 88.89(12)  | N3   | C12  | C11  | 119.3(4)  |
| N4   | Mn1  | N3   | 78.63(17)  | N3   | C12  | C13  | 123.0(5)  |
| C28  | Mn1  | Br1  | 91.42(18)  | C13  | C12  | C11  | 117.7(5)  |
| C28  | Mn1  | N3   | 171.5(2)   | C12  | C13  | C14  | 120.7(5)  |
| C28  | Mn1  | N4   | 93.3(2)    | C13  | C14  | C17  | 122.7(6)  |
| C28  | Mn1  | C30  | 85.8(2)    | C15  | C14  | C13  | 115.9(5)  |
| C29  | Mn1  | Br1  | 174.36(16) | C15  | C14  | C17  | 121.4(6)  |
| C29  | Mn1  | N3   | 92.5(2)    | C16  | C15  | C14  | 121.1(5)  |
| C29  | Mn1  | N4   | 96.1(2)    | N3   | C16  | C15  | 122.8(5)  |
| C29  | Mn1  | C28  | 90.9(2)    | N3   | C16  | C23  | 114.6(5)  |
| C29  | Mn1  | C30  | 90.5(2)    | C15  | C16  | C23  | 122.6(5)  |
| C30  | Mn1  | Br1  | 84.53(16)  | C18  | C17  | C14  | 119.0(6)  |
| C30  | Mn1  | N3   | 101.98(19) | C22  | C17  | C14  | 121.3(6)  |
| C30  | Mn1  | N4   | 173.3(2)   | C22  | C17  | C18  | 119.7(6)  |
| C31  | N1   | C1   | 129.1(5)   | C17  | C18  | C19  | 118.5(9)  |
| C7   | N2   | C11  | 119.7(4)   | C18  | C19  | C20  | 120.0(10) |
| C12  | N3   | Mn1  | 128.9(3)   | C21  | C20  | C19  | 119.5(8)  |
| C12  | N3   | C16  | 116.4(4)   | C20  | C21  | C22  | 119.9(10) |
| C16  | N3   | Mn1  | 114.5(4)   | C17  | C22  | C21  | 122.3(9)  |
| C23  | N4   | Mn1  | 116.5(3)   | N4   | C23  | C16  | 115.0(4)  |
| C27  | N4   | Mn1  | 125.2(4)   | N4   | C23  | C24  | 122.5(6)  |
| C27  | N4   | C23  | 118.0(5)   | C24  | C23  | C16  | 122.5(5)  |
| C2   | C1   | N1   | 118.7(5)   | C23  | C24  | C25  | 117.0(6)  |
| C6   | C1   | N1   | 121.1(5)   | C26  | C25  | C24  | 120.5(6)  |
| C6   | C1   | C2   | 120.1(5)   | C25  | C26  | C27  | 118.8(7)  |
| C1   | C2   | C7   | 125.2(5)   | N4   | C27  | C26  | 123.1(7)  |
| C3   | C2   | C1   | 116.9(5)   | O4   | C28  | Mn1  | 177.8(5)  |
| C3   | C2   | C7   | 117.8(5)   | O3   | C29  | Mn1  | 178.0(4)  |
| C4   | C3   | C2   | 123.1(6)   | O2   | C30  | Mn1  | 172.9(5)  |
| C5   | C4   | C3   | 118.4(6)   | O1   | C31  | N1   | 123.5(5)  |
| C6   | C5   | C4   | 119.9(7)   | O1   | C31  | C32  | 119.9(5)  |

|     |     |     |          |     |     |     |          |
|-----|-----|-----|----------|-----|-----|-----|----------|
| C1  | C6  | C5  | 121.6(6) | N1  | C31 | C32 | 116.5(5) |
| N2  | C7  | C2  | 119.5(4) | C33 | C32 | C31 | 123.5(4) |
| N2  | C7  | C8  | 119.5(5) | C33 | C32 | C37 | 119.6(5) |
| C8  | C7  | C2  | 121.1(5) | C37 | C32 | C31 | 116.8(5) |
| C9  | C8  | C7  | 120.7(5) | C32 | C33 | C34 | 119.3(5) |
| C8  | C9  | C10 | 119.5(5) | C35 | C34 | C33 | 121.7(6) |
| C11 | C10 | C9  | 117.5(6) | C34 | C35 | C36 | 119.1(6) |
| N2  | C11 | C10 | 123.2(5) | C35 | C36 | C37 | 120.9(5) |
| N2  | C11 | C12 | 117.3(4) | C36 | C37 | C32 | 119.4(6) |

Symmetry transformations used to generate equivalent atoms:

Table S 3 Crystal data and structure refinement for **1p**.

|                                             |                                                                                 |
|---------------------------------------------|---------------------------------------------------------------------------------|
| Identification code                         | exp_2211                                                                        |
| Empirical formula                           | C <sub>74</sub> H <sub>48</sub> BrMn <sub>2</sub> N <sub>8</sub> O <sub>8</sub> |
| Formula weight                              | 1366.99                                                                         |
| Temperature/K                               | 99.9(3)                                                                         |
| Crystal system                              | monoclinic                                                                      |
| Space group                                 | P2 <sub>1</sub> /c                                                              |
| a/Å                                         | 12.2992(7)                                                                      |
| b/Å                                         | 16.1840(10)                                                                     |
| c/Å                                         | 19.0169(12)                                                                     |
| α/°                                         | 90                                                                              |
| β/°                                         | 108.760(7)                                                                      |
| γ/°                                         | 90                                                                              |
| Volume/Å <sup>3</sup>                       | 3584.2(4)                                                                       |
| Z                                           | 2                                                                               |
| ρ <sub>calc</sub> /cm <sup>3</sup>          | 1.267                                                                           |
| μ/mm <sup>-1</sup>                          | 0.967                                                                           |
| F(000)                                      | 1394.0                                                                          |
| Crystal size/mm <sup>3</sup>                | 0.12 × 0.11 × 0.1                                                               |
| Radiation                                   | Mo Kα (λ = 0.71073)                                                             |
| 2θ range for data collection/°              | 4.308 to 49.998                                                                 |
| Index ranges                                | -14 ≤ h ≤ 14, -19 ≤ k ≤ 15, -18 ≤ l ≤ 22                                        |
| Reflections collected                       | 23945                                                                           |
| Independent reflections                     | 6323 [R <sub>int</sub> = 0.1135, R <sub>sigma</sub> = 0.1084]                   |
| Data/restraints/parameters                  | 6323/0/424                                                                      |
| Goodness-of-fit on F <sup>2</sup>           | 1.029                                                                           |
| Final R indexes [I >= 2σ (I)]               | R <sub>1</sub> = 0.0773, wR <sub>2</sub> = 0.1958                               |
| Final R indexes [all data]                  | R <sub>1</sub> = 0.1169, wR <sub>2</sub> = 0.2282                               |
| Largest diff. peak/hole / e Å <sup>-3</sup> | 0.99/-0.47                                                                      |

## 6. Electrochemistry Study Details

**Cyclic voltammetry (CV):** Cyclic voltammetry experiments were carried out in a three-electrode cell under high-purity Ar (99.999%) or CO<sub>2</sub> (99.99%) using CHI 760E potentiostat. The working electrode was a glassy carbon disc (diameter 3 mm) polished with 0.5- $\mu$ m diamond pastes, then sonicated in ion-free water for 15 min and washed with MeCN prior to use. The reference electrode was a Ag<sup>+</sup>/Ag (0.01 M AgNO<sub>3</sub>) electrode and the counter electrode was platinum wire. Manganese complex concentrations were generally at 0.5 mM. A solution of 0.1 M <sup>n</sup>Bu<sub>4</sub>NPF<sub>6</sub> (Fluka, electrochemical grade) in CH<sub>3</sub>CN was used as supporting electrolyte, which was degassed by bubbling with dry Ar or CO<sub>2</sub> for 5 min before measurement. The catalytic experiments with CO<sub>2</sub> were performed in CO<sub>2</sub>-saturated CH<sub>3</sub>CN solution (about 0.28 M) with addition of a certain amount of anhydrous PhOH. The scan rate is 100 mV/s. Ferrocene (Fc) was added as an internal reference in the end of each measurement to convert the measured potentials and *all potentials given in this work are referred to Fc<sup>+0</sup>*.

**Controlled potential electrolysis experiments (CPE):** Controlled potential electrolysis experiments were carried out in a custom 18 mL cell designed in our laboratory. The setup included a glassy carbon cell working electrode, graphite rod counter electrode separated from the solution by a porous glass frit, and Ag/AgNO<sub>3</sub> pseudoreference electrode. For the catalytic electrolysis studies, the cell was charged with Mn catalyst (0.5 mM) and PhOH (1 M) in 0.1 M <sup>n</sup>Bu<sub>4</sub>NPF<sub>6</sub> solution (CH<sub>3</sub>CN). Gas products were quantified by analyzing 50  $\mu$ L aliquots of the headspace on a Beifen 6890A Series gas chromatograph. The partial pressure of H<sub>2</sub>/CO in the headspace was determined by comparison to gas standard samples. Henry's Law was used to calculate the total H<sub>2</sub>/CO production, given as the sum of headspace and dissolved H<sub>2</sub>/CO.

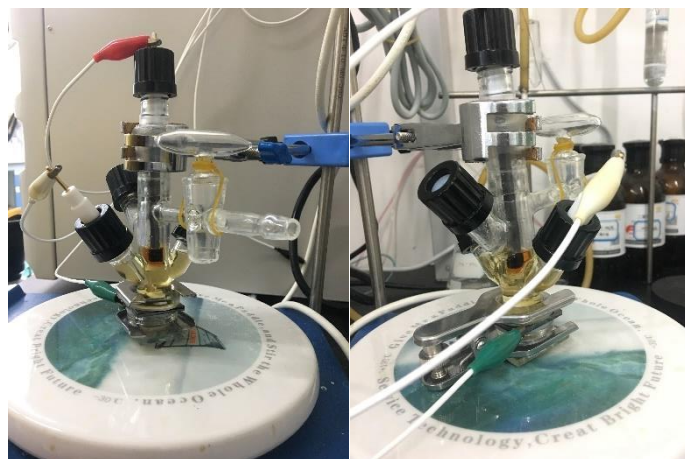

### Typical Experimental Conditions:

Purity of the electrolyte medium was confirmed over the available electrochemical window through background scans taken prior to addition of analyte. 2.9 mg (0.5 mM) of **1p** and 0.74 g (1 M) of PhOH were weighed into an 18 mL glass vial and dissolved in 8 mL of a supporting electrolyte solution (0.1 M [ $n$ Bu<sub>4</sub>N][PF<sub>6</sub>]/CH<sub>3</sub>CN). The solution was saturated with CO<sub>2</sub> by bubbling CO<sub>2</sub> into the electrolyte for about 30 min prior to the experiment.

## 7. Product Analysis

The **gas products** in the headspace of the cell were analyzed by a gas chromatograph (GC, Beifen 6890A s), which was equipped with TCD and FID detectors. Gas sample  $\text{H}_2$ ,  $\text{CH}_4$  and  $\text{CO}$  are separated by stainless-steel column packed with molecular sieves ( $5 \text{ \AA} \times 3 \text{ m}$ ) and the carrier gas is  $\text{Ar}$  (flow rate =  $35 \text{ mL min}^{-1}$ ). The TCD detector was used to detect  $\text{H}_2$  at a detection limit of 1 ppm. The FID detector was furnished with a methanizer to detect  $\text{CH}_4$  and  $\text{CO}$  at a detection limit of 0.5 ppm. Gas chromatography calibration curves were made by sampling known volumes of  $\text{H}_2$ ,  $\text{CH}_4$  and  $\text{CO}$  gas. Other gas samples such as ethylene and ethanal could be separated by Porapak N column and detected by FID. The operating temperatures of the injection port, the oven/column, and detector were  $50^\circ\text{C}$ ,  $50^\circ\text{C}$  and  $380^\circ\text{C}$ , respectively. Aliquots ( $50 \text{ }\mu\text{L}$ ) of the gas headspace were injected into the GC in the end of electrolysis to analyze the gas products formed. The gas path is shown in the figure below.

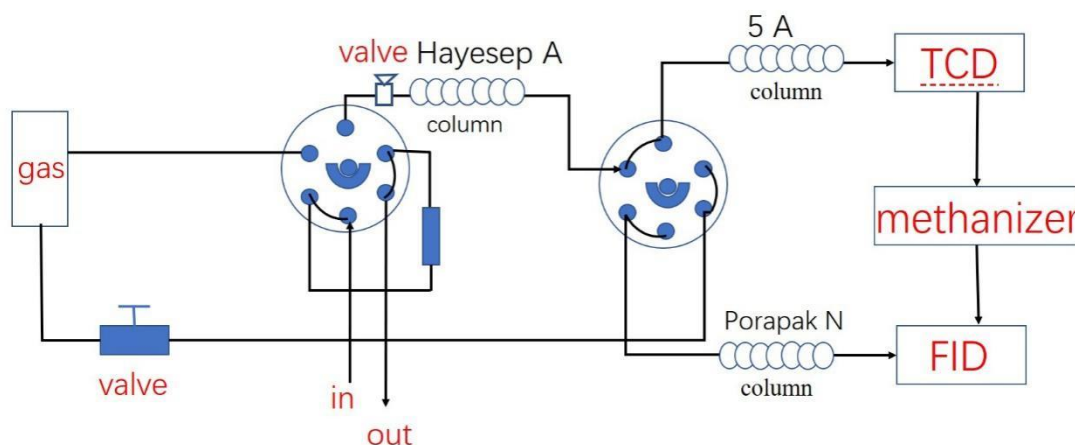

The **liquid product** ( $\text{HCOOH}$ ) in the resulting electrolyte was detected by using ion chromatograph (Shenghan ICS-380), which was equipped with an electrical conductivity detector and an ionic exchange column. The ion chromatographic measurements were made with  $1 \text{ M}$   $\text{K}_2\text{CO}_3/\text{KHCO}_3$  aqueous solution as flowing phase in a negative ion model and with potassium formate as external standard. Before measurement, the resulting electrolyte was treated with  $1 \text{ M}$   $\text{K}_2\text{CO}_3/\text{KHCO}_3$  aqueous solution for 1 h to convert formic acid in the solution to potassium formate.

## 8. Calculation for Faradaic Efficiency

$$\text{Faradaic yield product (\%)} = 100 \times n_{\text{prod.}} / (Q / F / 2)$$

Where F is the Faraday constant ( $\text{C mol}^{-1}$ ),  $n_{\text{prod}}$  (mol) is the amount of CO measured in the headspace, and Q (C) is the charged passed during electrolysis.

## 9. Fourier-Transform Infrared Reflectance Spectroelectrochemistry (FTIR-SEC)

A homemade FTIR-SEC instrument was used for this study. The cell consists of a glass carbon working electrode (10 mm), a Pt counter (15 mm  $\times$  30 mm) electrode, and a Ag/AgNO<sub>3</sub> reference electrode and a CaF<sub>2</sub> plate as the optical window. The IR beam is directed to focus on the working electrode through the optical window, where it is reflected and ultimately directed to the Bruker Vertex 80 detector. The dry CH<sub>3</sub>CN solution (0.2 M TBAP) prepared under an atmosphere of Ar is used as the electrolyte.

## 10. Experiment section

**General procedure for the preparation of the target ligands involved in this article.** The procedure was slightly modified according to the literature (Solan, G. A. et. al. *Organometallics* 2013, 32, 249–259). An oven-dried Schlenk flask equipped with a stir bar was evacuated, back-filled with Ar, and charged with 1 equiv 2-bromo-precursors, 1.1 equiv corresponding phenylboric acid, 0.05 equiv Pd(PPh<sub>3</sub>)<sub>4</sub>, toluene (50 mL), ethanol (50 mL) and an aqueous 2 M solution of potassium carbonate (12 mL). The solution was stirred at room temperature for 15 min before heated to 90 °C for 42 h, the mixture was cooled to room temperature and 30% hydrogen peroxide (0.4 mL) was added. The mixture was stirred at room temperature for 30 min, the product was extracted using diethyl ether (2 × 100 mL), and the extract was washed with saturated sodium chloride solution (1 × 30 mL) and water (3 × 30 mL) to give a red organic layer. Following drying with magnesium sulfate, the volatiles were removed under reduced pressure to give an orange-brown residue. The catalyst residues were removed using a short silica gel column employing dichloromethane as eluting solvent. After the solvent was removed under reduced pressure, the product was obtained as a solid.

### Synthesis of ligand L<sup>1</sup>



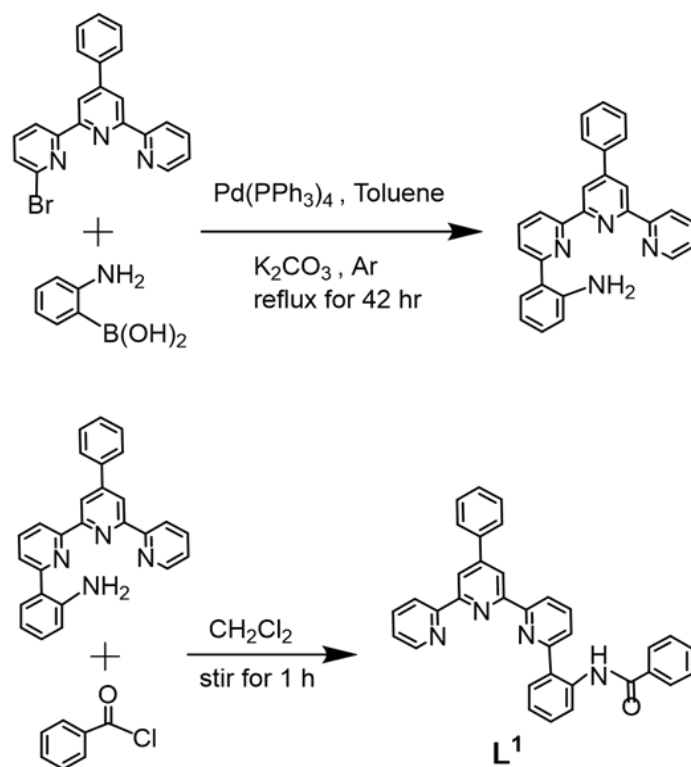

Scheme S 1 preparation of target ligands  $L^1$

2-bromo-6-(4-phenyl-6-(pyridin-2-yl)pyridin-2-yl)pyridine was obtained according to literature procedures. (Constable, E. C. *et. al. J. Chem. Soc., Dalton Trans.*, **1996**, 389, 4207-4216). 2-(6-(4-phenyl-6-(pyridin-2-yl)pyridin-2-yl)pyridin-2-yl)aniline, which was obtained according to literature procedures (Solan, G. A. *et. al. Organometallics.*, **2013**, 32, 249–259).

Preparation of  $L^1$ .  $L^1$  was prepared by stirring the mixture of benzoyl chloride and 2-(6-(4-phenyl-6-(pyridin-2-yl)pyridin-2-yl)pyridin-2-yl)aniline. Excessive benzoyl chloride was added to a solution of 2-(6-(4-phenyl-6-(pyridin-2-yl)pyridin-2-yl)pyridin-2-yl)aniline (1 g, 2.5 mmol) in  $CH_2Cl_2$  (15 ml). The triethylamine (3-5 ml) was added to the mixture after 5 minutes. The resulting mixture was stirred at room temperature for 1 h. Finally, the mixture was poured into weak base solution for dispose of the excessive benzoyl chloride. The mixture solution was extracted with  $CH_2Cl_2$  ( $3 \times 50$  ml). The product was purified by column chromatograph ( $CH_2Cl_2$ ) over silica gel to obtain  $L^1$ .  $^1H$  NMR (DMSO, 600 MHz):  $\delta$  11.92 (1H, s), 9.13~9.05 (3H, m), 8.95 (1H, s), 8.75~8.72 (1H, t), 8.63 (1H, m), 8.38~8.37 (1H, d), 8.27~8.24 (1H, t), 8.15~8.13 (1H, t), 8.05~8.03 (1H, d), 7.91~7.90 (1H, d), 7.78~7.77 (2H, d), 7.62~7.53 (3H, m), 7.51~7.50 (3H, m), 7.40~7.38 (1H, t),

7.23~7.21 (1H, t), 6.96~6.94 (2H, t). ESI-MS: Calcd for  $[M+H]^+$ :  $m/z$  505.58; found: 505.20.

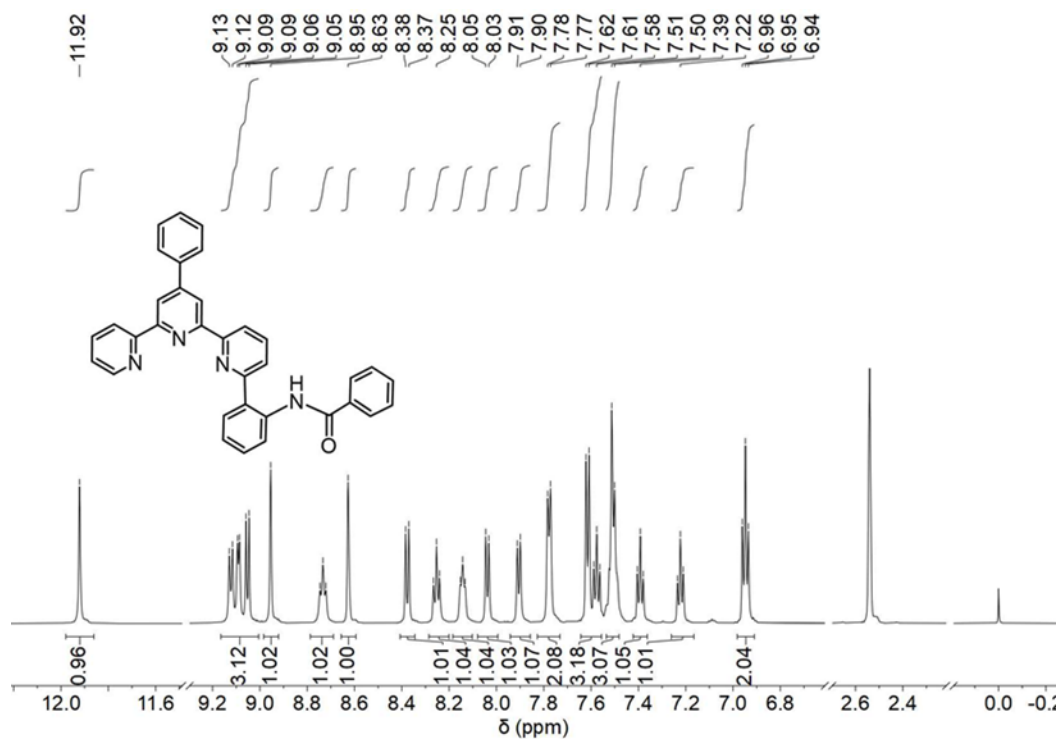

Figure S 1  $^1H$  NMR (DMSO, 600 MHz) spectrum of  $L^1$ .

### Synthesis of ligand $L^2$

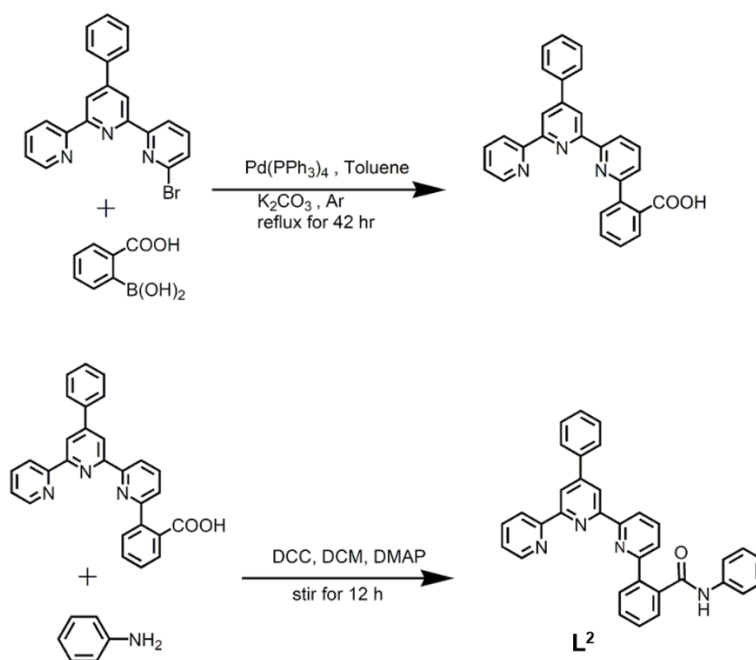

Scheme S 2 preparation of target ligands  $L^2$

2-bromo-6-(4-phenyl-6-(pyridin-2-yl)pyridin-2-yl)pyridine was obtained according to literature procedures. (Constable, E. C. *et. al. J. Chem. Soc., Dalton Trans.*, **1996**, 389, 4207-4216). 2-(6-(4-phenyl-6-(pyridin-2-yl)pyridin-2-yl)pyridin-2-yl)benzoic acid was obtained according to literature procedures (Solan, G. A. *et. al. Organometallics.*, **2013**, 32, 249–259).

Preparation of **L<sup>2</sup>**. 2-(6-(4-phenyl-6-(pyridin-2-yl)pyridin-2-yl)pyridin-2-yl)benzoic acid (1.72 g, 4 mmol) was dissolved in CH<sub>2</sub>Cl<sub>2</sub> (15 ml) and dicyclohexylcarbodiimide (DCC, 1.65 g, 8 mmol) was added. Aniline (0.75 g, 8 mmol) and 4-dimethylaminopyridine (0.1 g, 8 mmol) was added after the mixture stirred for 10 minutes. Then the mixture was stirred for 12 h. Finally, the product was purified by low temperature filtration. Evaporation of the solvent, the product was purified by column chromatograph (CH<sub>2</sub>Cl<sub>2</sub>) over silica gel to obtain **L<sup>2</sup>**. <sup>1</sup>H NMR (DMSO, 600 MHz): δ 10.29 (1H, s), 8.75 ~ 8.74 (2H, m), 8.65~8.60 (3H, m), 8.14~8.11 (1H, t), 8.03 (1H, t), 7.91~7.87 (2H, m), 7.81~7.80 (2H, d), 7.67~7.65 (2H, m), 7.62~7.60 (1H, m), 7.56~7.51 (4H, m), 7.44~7.43 (2H, m), 6.91~6.88 (2H, t), 6.78~6.75 (1H, t). ESI-MS: Calcd for [M+H]<sup>+</sup>: *m/z* 505.22; found: 505.41.

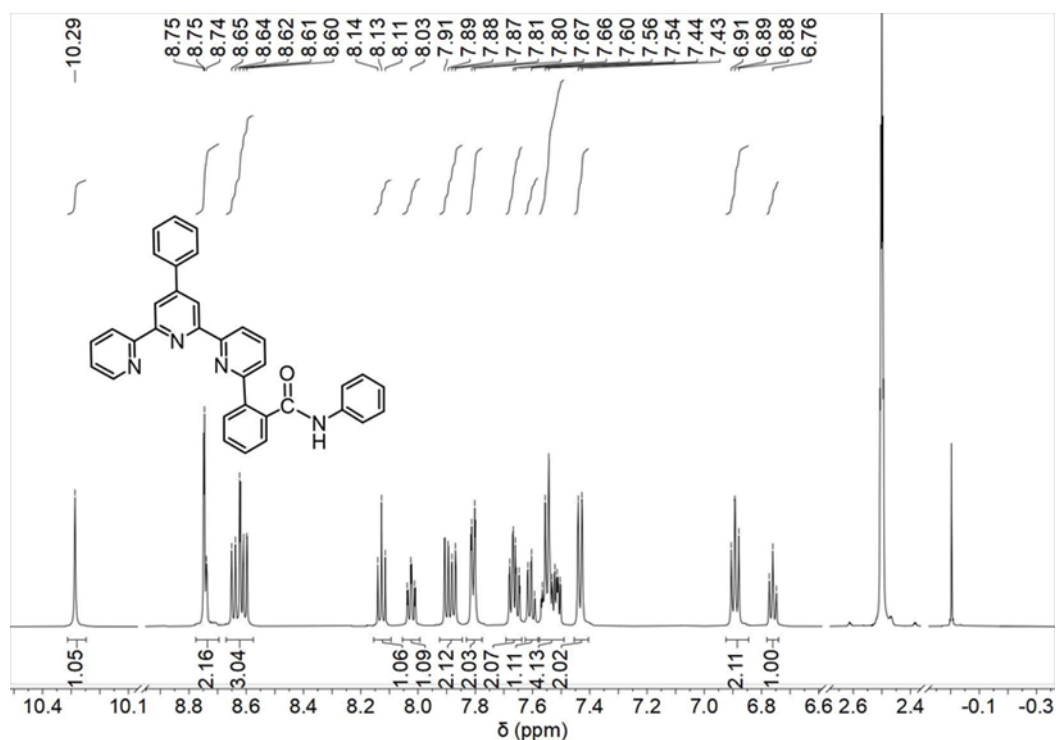

Figure S 2 <sup>1</sup>H NMR (DMSO, 600 MHz) spectrum of **L<sup>2</sup>**.

## Synthesis of ligand $L^3$

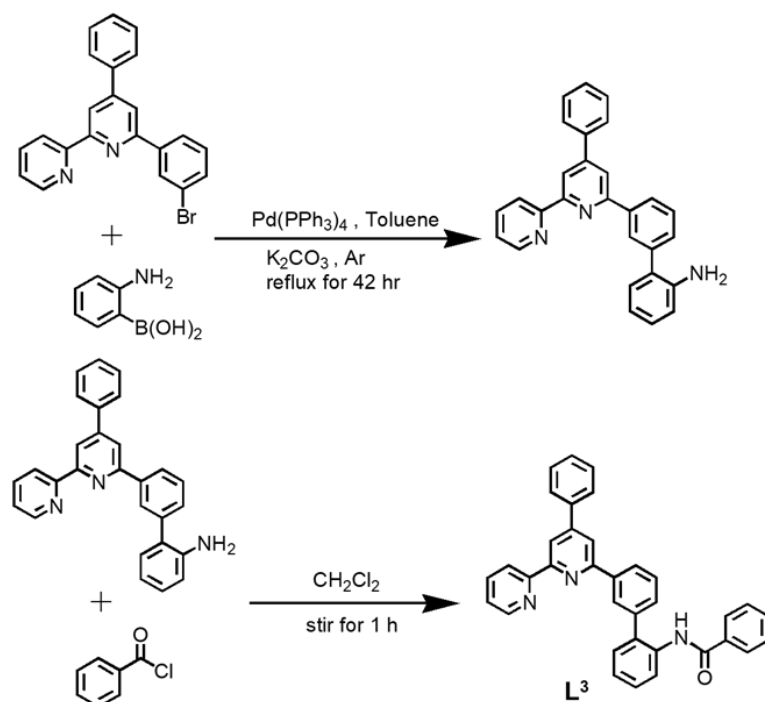

Scheme S 3 preparation of target ligands  $L^3$

2-bromo-6-(4-phenyl-6-(pyridin-2-yl)pyridin-2-yl)phenyl was obtained according to literature procedures. (Constable, E. C. *et. al. J. Chem. Soc., Dalton Trans.*, **1996**, 389, 4207-4216).

Preparation of  $L^3$ .  $L^3$  was prepared by stirring the mixture of benzoyl chloride and 2-(6-(4-phenyl-6-(pyridin-2-yl)pyridin-2-yl)phenyl-2-yl)aniline, which was obtained according to literature procedures (Solan, G. A. *et. al. Organometallics* 2013, 32, 249–259). The experimental procedure is the same with  $L^1$ .  $^1\text{H NMR}$  ( $\text{DCCl}_3$ , 600 MHz):  $\delta$  8.71 (2H, s), 8.62~8.61 (1H, d), 8.56~8.55 (1H, d), 8.41 (1H, s), 8.27~8.26 (1H, s), 8.22 (1H, d), 8.02 (1H, s), 7.81~7.80 (3H, t), 7.69~7.67 (3H, m), 7.55~7.56 (1H, d), 7.53~7.50 (3H, m), 7.48~7.47 (1H, d), 7.44~7.43 (1H, m), 7.35~7.34 (2H, m), 7.30~7.27 (1H, t), 7.25~7.23 (1H, d). ESI-MS: Calcd for  $[\text{M}+\text{H}^+]^+$ :  $m/z$  504.23; found: 504.59.

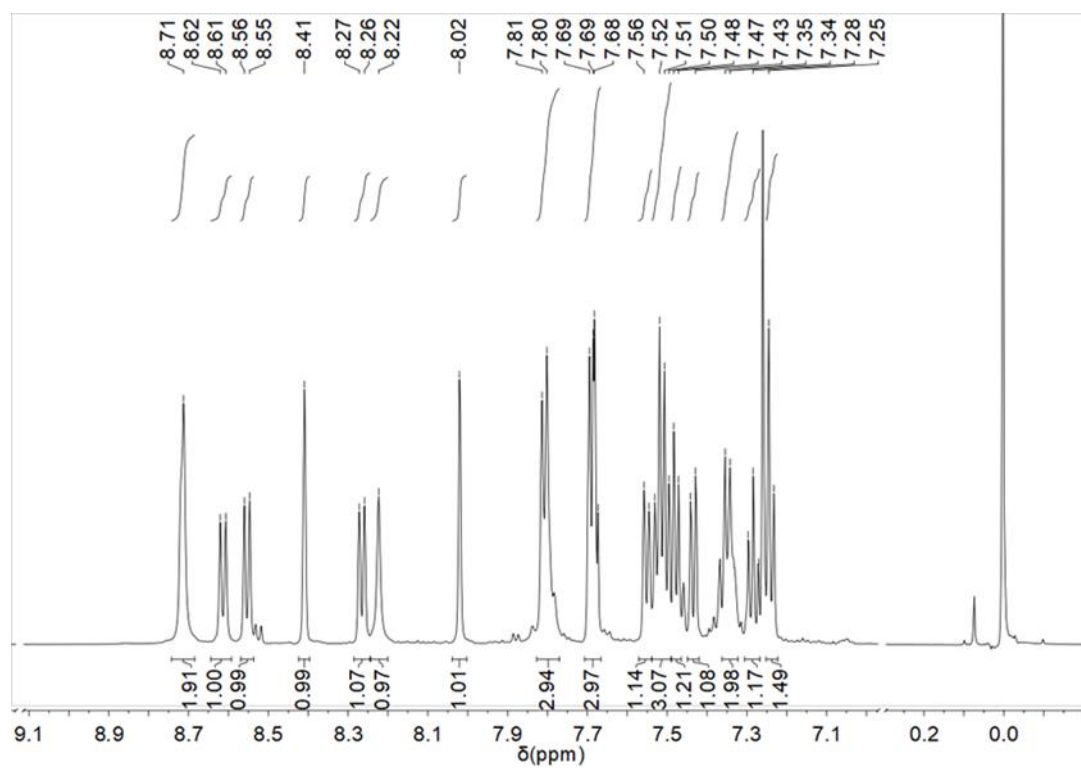

Figure S 3  $^1\text{H}$  NMR ( $\text{CDCl}_3$ , 600 MHz) spectrum of  $\text{L}^3$ .

## Synthesis of complexes 1p, 2p and 3

### Synthesis of complex 1p

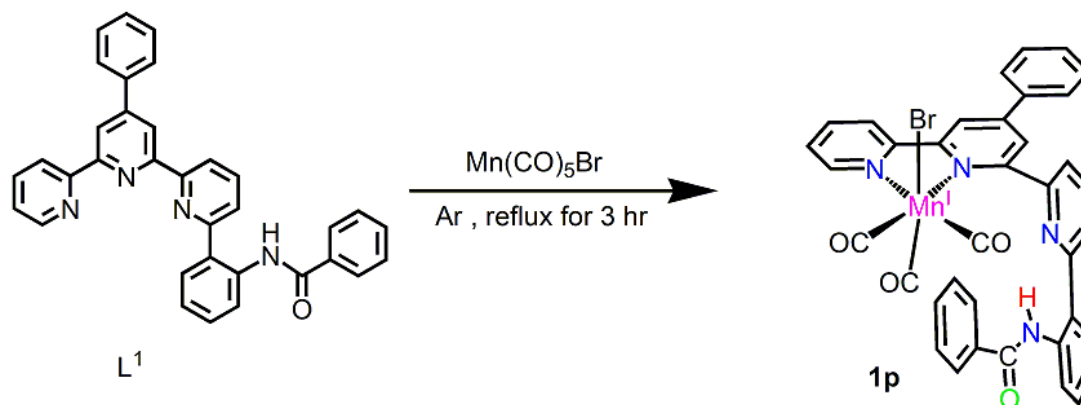

Scheme S 4 preparation of target complex 1p

**Preparation of 1p.** Compound Mn(CO)<sub>5</sub>Br (0.2 g, 0.72 mmol) was added to a degassed methanol solution (20 mL) of L<sup>1</sup> (0.363 g, 0.72 mmol). The resulting orange solution was heated to reflux for 3 h under argon, then allowed to cool to room temperature before filtration. The filtrate was collected and concentrated, then washed with Et<sub>2</sub>O and dried in vacuo to afford 0.42 g (85% yield) of orange product. The following were observed for the mixture of atropisomers (hydroxyphenyl adduct parallel and antiparallel to the axial plane): IR (THF)  $\nu_{CO}$ : 2020(s), 1927(br), 1903(m) cm<sup>-1</sup>. <sup>1</sup>H NMR (DMSO, 600 MHz):  $\delta$  12.68 (1H, s), 9.04~9.12 (3H, m), 8.52~8.53 (1H, d), 8.23~8.31 (6H, m), 8.05~8.08 (2H, m), 7.64~7.66 (4H, m), 7.48~7.51 (2H, m), 7.30~7.32 (3H, m), 6.82 (2H, s). Anal. Calcd for C<sub>37</sub>H<sub>24</sub>BrMnN<sub>4</sub>O<sub>4</sub>(%): C, 61.43; H, 3.34; N, 7.74. found: C, 61.45; H, 3.32; N, 7.75. MS (TOF-ES):  $m/z = 643.1180$  [M-Br<sup>-</sup>]<sup>+</sup>,  $m/z = 615.1229$  [M-Br<sup>-</sup>-CO]<sup>+</sup>.

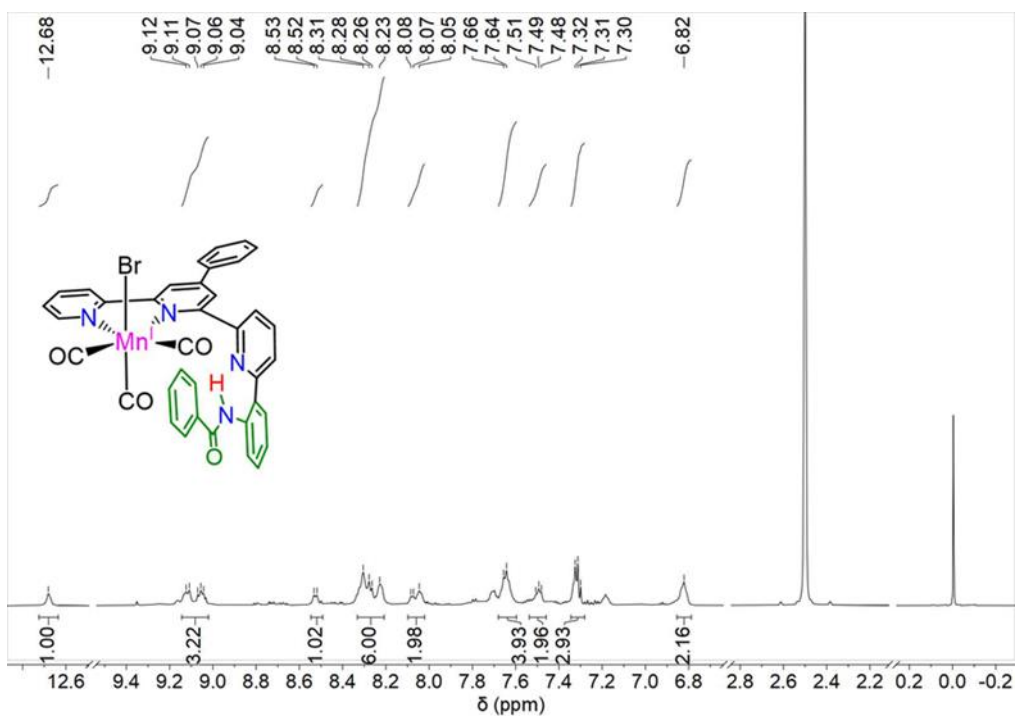

Figure S 4  $^1\text{H}$  NMR (DMSO, 600 MHz) spectrum of **1p**.

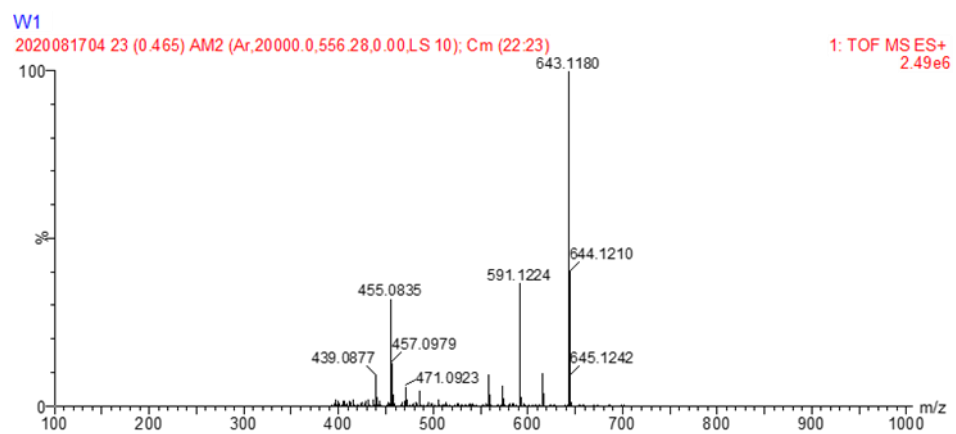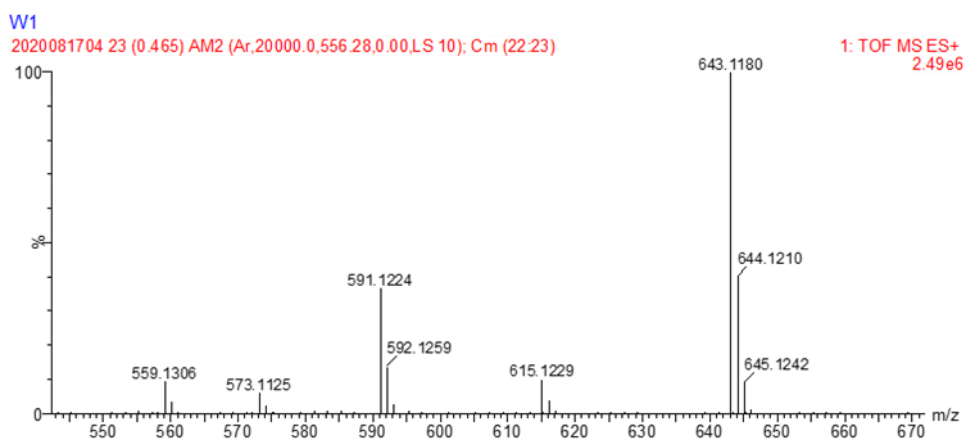

Figure S 5 High resolution mass spectra of complex **1p**.

## Synthesis of complex **2p**

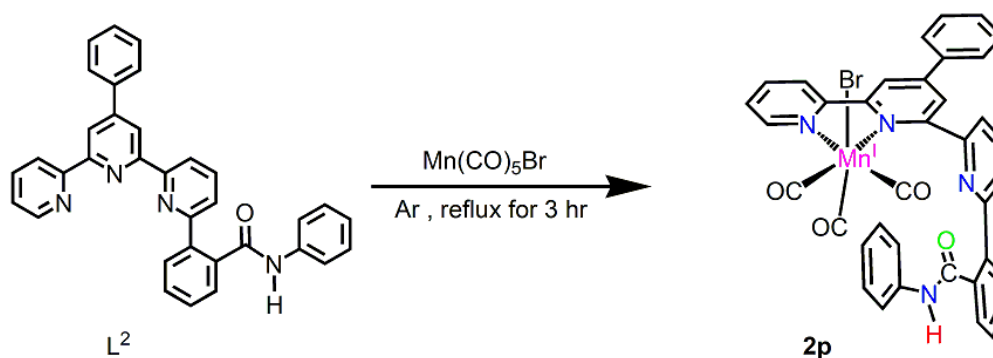

Scheme S 5 preparation of target complex **2p**

**Preparation of 2p.** Replacing ligand **L<sup>1</sup>** with **L<sup>2</sup>**, complex **2p** was prepared by the same way with complex **1p** in a yield of 82%. IR (THF)  $\nu_{CO}$  for complex **2p**: 2025 (s), 1932(br), 1917 (m)  $\text{cm}^{-1}$ .  $^1\text{H}$  NMR (DMSO, 600 MHz):  $\delta$  10.29 (1H, s), 9.20~9.21 (1H, d), 8.95~8.96 (1H, m), 8.91 (1H, s), 8.25 ~ 8.28 (1H, m), 8.11~8.13 (1H, m), 7.88~7.89 (2H, d), 7.71~7.80 (4H, m), 7.57~7.63 (8H, m), 6.89~7.05 (4H, m). Anal. Calcd for  $\text{C}_{37}\text{H}_{24}\text{BrMnN}_4\text{O}_4$ (%): C, 61.43; H, 3.34; N, 7.74. found: C, 61.50; H, 3.31; N, 7.70. MS (TOF-ES):  $m/z = 643.1177$   $[\text{M}-\text{Br}]^+$ ,  $m/z = 615.1226$   $[\text{M}-\text{Br}^-\text{CO}]^+$ ,  $m/z = 559.1309$   $[\text{M}-\text{Br}^-3\text{CO}]^+$ .

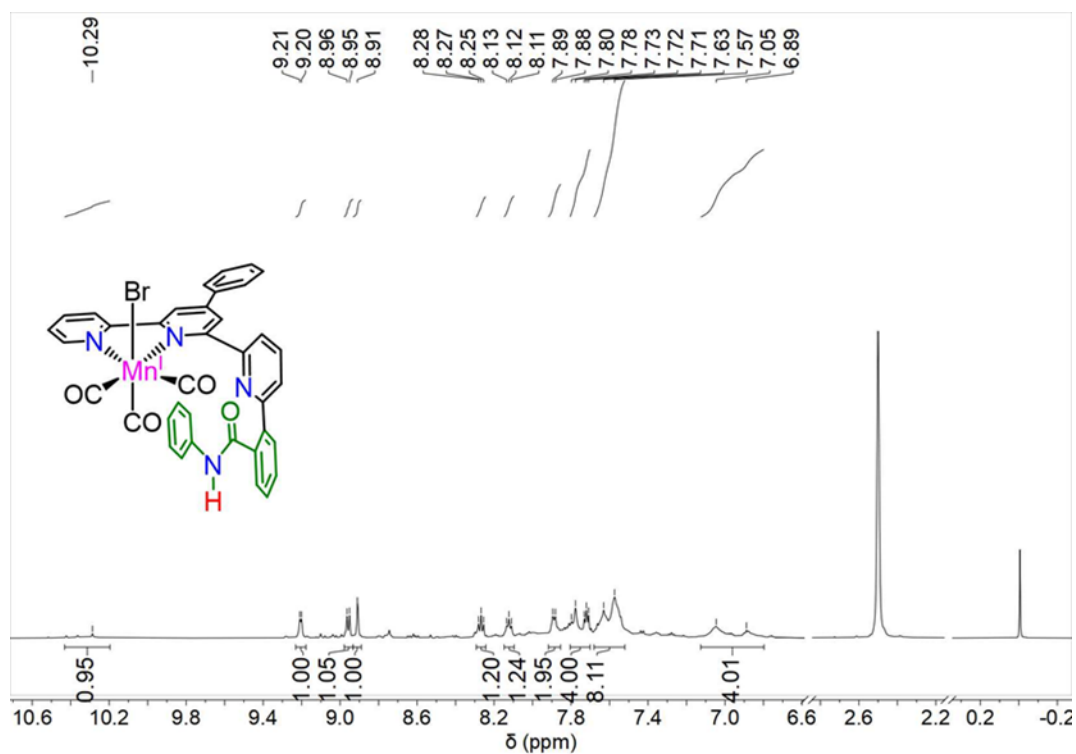

Figure S 6  $^1\text{H}$  NMR (DMSO, 600 MHz) spectrum of **2p**.



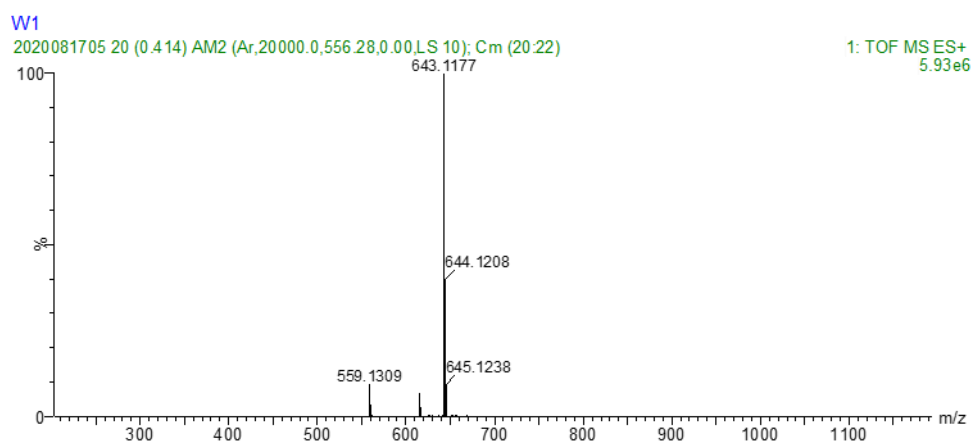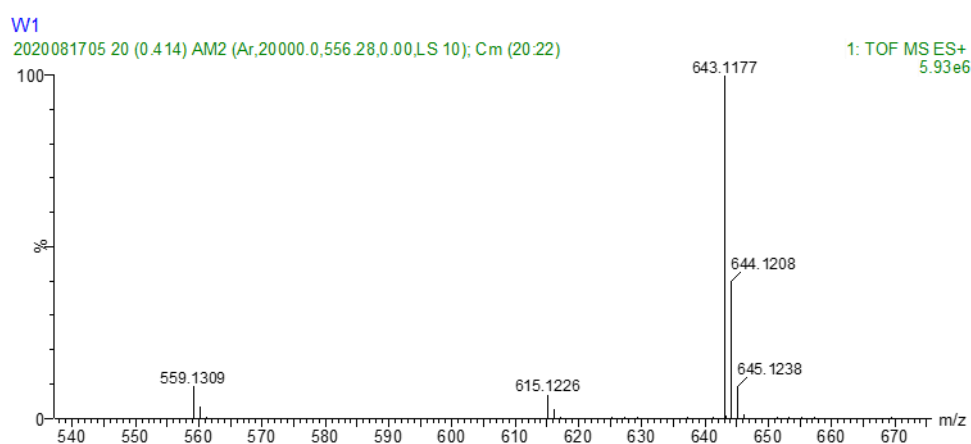

Figure S 7 High resolution mass spectra of complex **2p**.

### Synthesis of complex **3**

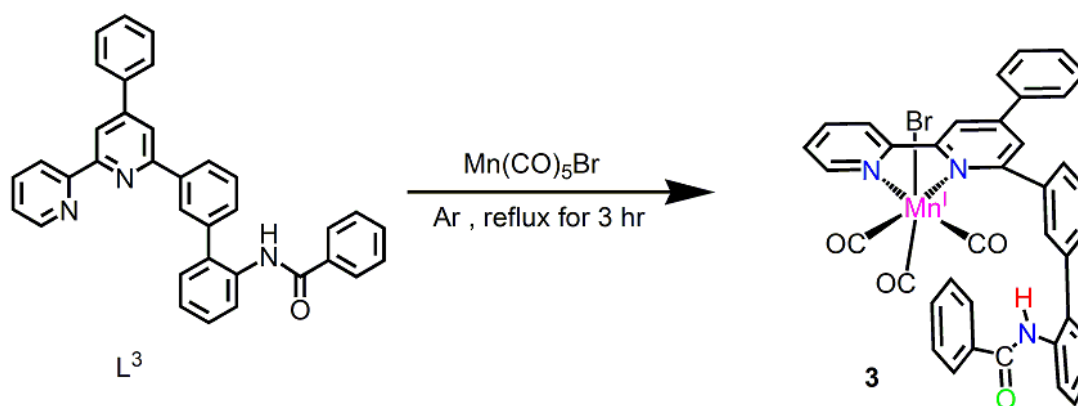

Scheme S 6 preparation of target complex **3**

**Preparation of 3.** Replacing ligand **L<sup>1</sup>** with **L<sup>3</sup>**, complex **3** was prepared by the same way with

complex **1p** and **2p** in a yield of 88%. IR (THF)  $\nu_{CO}$  for complex **3**: 2026 (s), 1938 (br), 1912 (s)  $\text{cm}^{-1}$ .  $^1\text{H}$  NMR (DMSO, 600 MHz):  $\delta$  9.21 (1H, s), 8.98~8.96 (1H, d), 8.94~8.92 (1H, d), 8.28~8.26 (1H, t), 8.05 (1H, s), 7.90~7.89 (1H, d), 7.83~7.82 (1H, d), 7.79 (1H, s), 7.73 (1H, t), 7.67 (2H, d), 7.62~7.60 (4H, m), 7.56~7.53 (2H, m), 7.48~7.44 (3H, m), 7.40~7.37 (2H, t), 7.31~7.30 (1H, d). Anal. Calcd for  $\text{C}_{38}\text{H}_{25}\text{BrMnN}_3\text{O}_4$ (%): C, 63.17; H, 3.99; N, 8.91. found: C, 63.20; H, 3.95; N, 8.90. MS (TOF-ES):  $m/z = 642.1150$   $[\text{M}-\text{Br}]^+$ .

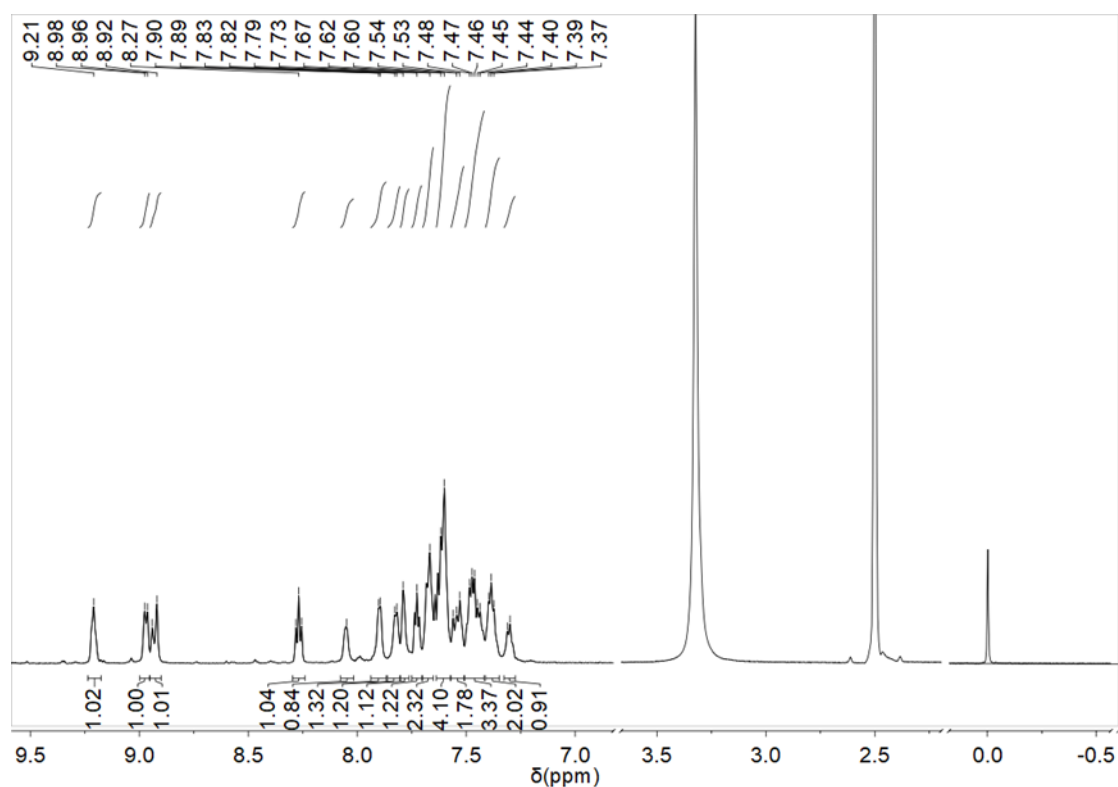

Figure S 8  $^1\text{H}$  NMR (DMSO, 600 MHz) spectrum of **3**.

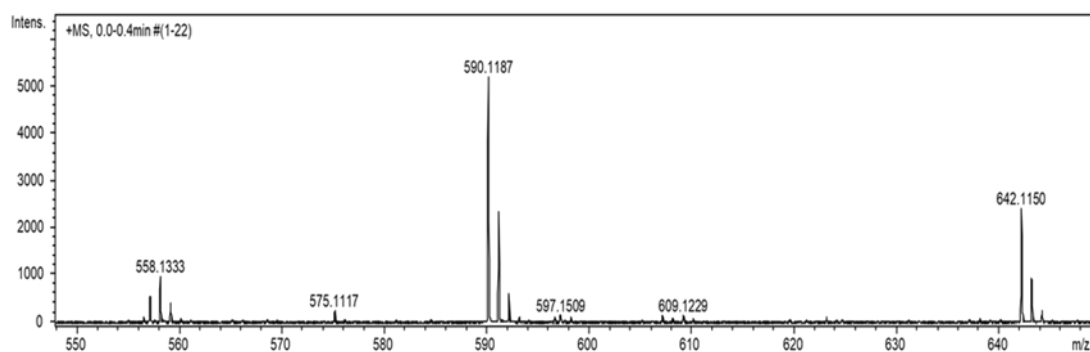

Figure S 9 High resolution mass spectra of complex **3**.

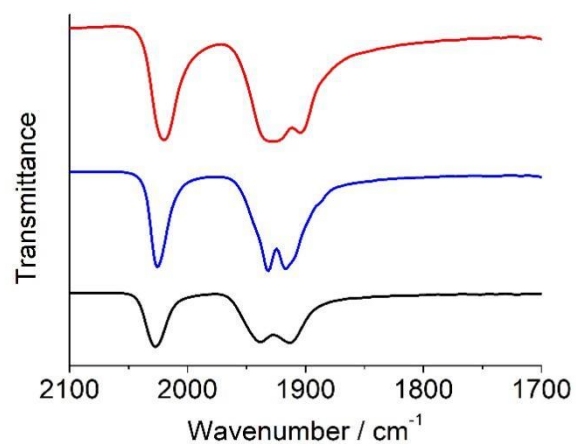

Figure S 10 Experimental FTIR spectra of **1p**(red line) , **2p**(blue line) and **3**(black line) recorded in KBr displaying characteristic  $\nu_{CO}$  stretching modes for their facial tricarbonyl geometries.

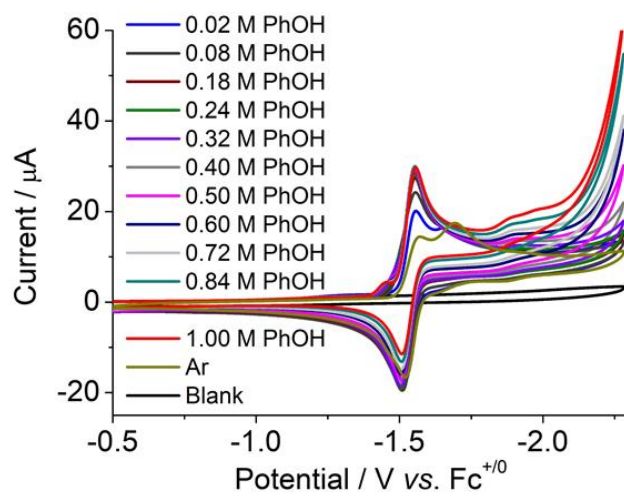

Figure S 11 CVs of 0.5 mM **1p** with varied concentrations of phenol under Ar. Voltammograms are taken at a scan rate of 100 mV/s with 0.1 M  $n\text{-Bu}_4\text{NPF}_6$  in MeCN solution. Glassy carbon working electrode,  $\text{Ag}^+/\text{Ag}$  reference electrode, and Pt wire counter electrode.

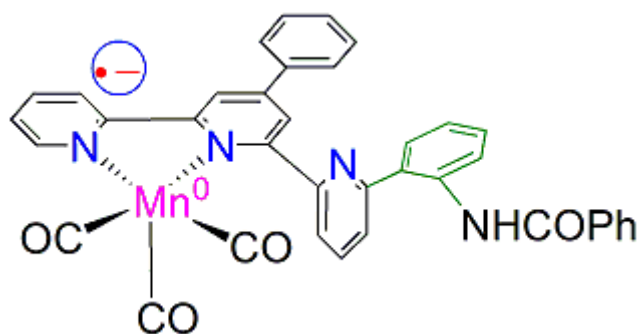

Figure S 12 Proposed structure of the intermediate [ $1p^{2-} - Br^-$ ]

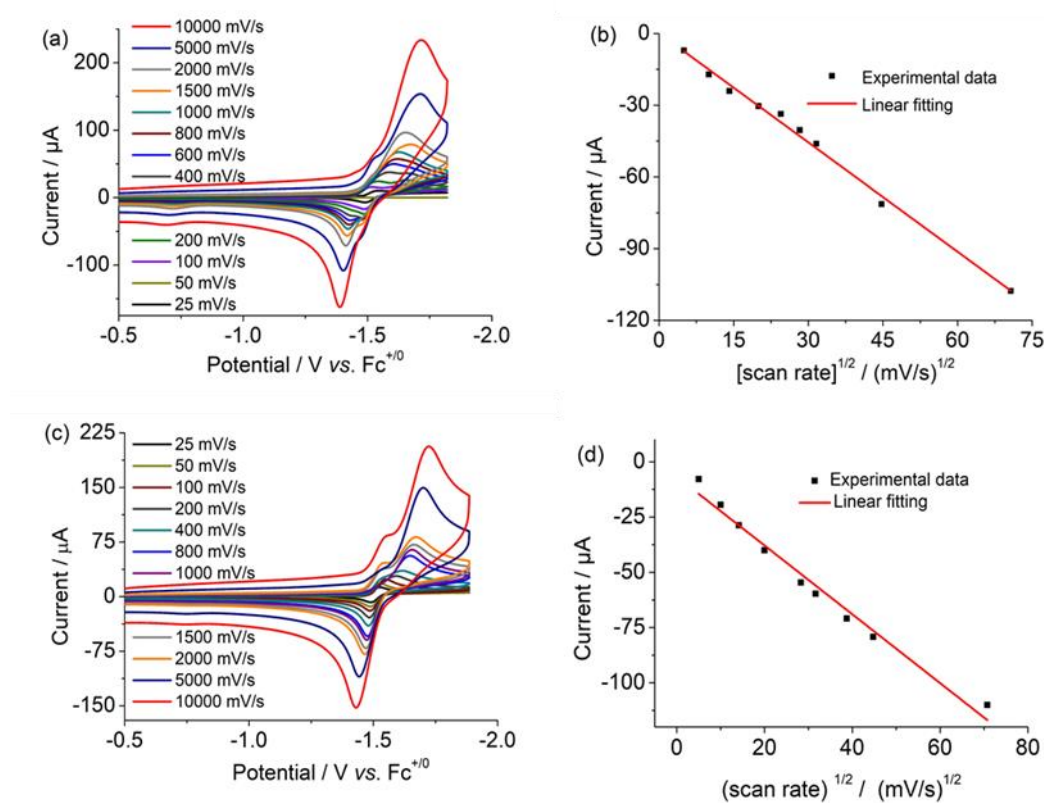

Figure S 13 (a) CVs of complex **1p** (0.5 mM) with scan rate ( $v$ ) varied from 0.025 V/s to 10 V/s under Ar. (b) Plot of anodic peak current ( $i_p$ ) vs.  $v^{1/2}$  for complex **1p**. (c) Cyclic voltammograms of complex **2p** (0.5 mM) with scan rate ( $v$ ) varied from 0.025 V/s to 10 V/s under Ar. (d) Plot of anodic peak current ( $i_p$ ) vs.  $v^{1/2}$  for complex **2p**. Voltammograms are taken in MeCN solution with 0.1 M  $^n\text{Bu}_4\text{NPF}_6$  as support electrolyte. Glassy carbon working electrode,  $\text{Ag}^+/\text{Ag}$  reference electrode, and Pt wire counter electrode.

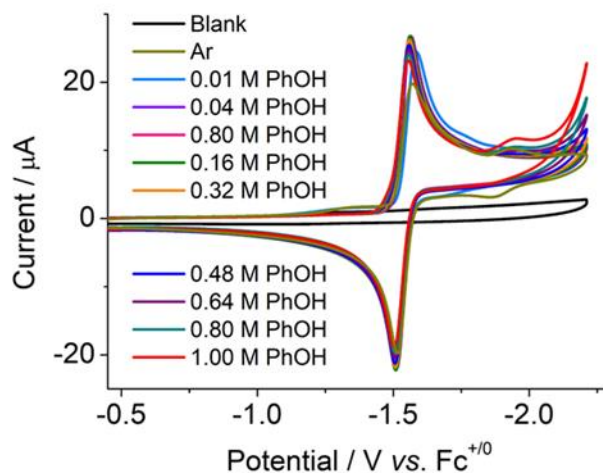

Figure S 14 CVs of 0.5 mM **2p** with varied concentrations of phenol under Ar. Voltammograms are taken at a scan rate of 100 mV/s with 0.1 M  $n\text{Bu}_4\text{NPF}_6$  in MeCN solution. Glassy carbon working electrode,  $\text{Ag}^+/\text{Ag}$  reference electrode, and Pt wire counter electrode.

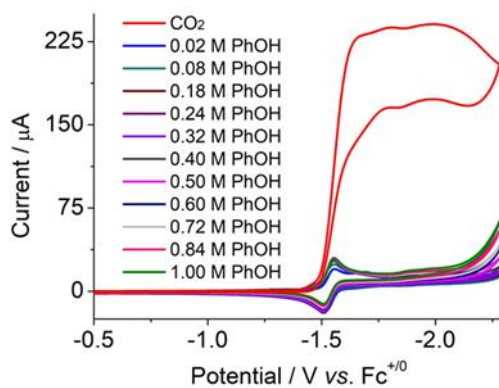

Figure S 15 CVs show 0.5 mM **1p** with varied amounts of phenol under Ar, and saturating with  $\text{CO}_2$  in the presence of 1 M phenol. Voltammograms are taken at a scan rate of 100 mV/s with 0.1 M  $n\text{Bu}_4\text{NPF}_6$  in MeCN solution. Glassy carbon working electrode,  $\text{Ag}^+/\text{Ag}$  reference electrode, and Pt wire counter electrode.

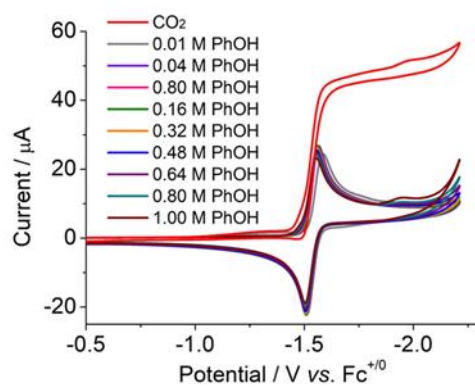

Figure S 16 CVs show 0.5 mM **2p** with varied amounts of phenol under Ar, and saturating with CO<sub>2</sub> in the presence of 1 M phenol. Voltammograms are taken at a scan rate of 100 mV/s with 0.1 M <sup>n</sup>Bu<sub>4</sub>NPF<sub>6</sub> in MeCN solution. Glassy carbon working electrode, Ag<sup>+</sup>/Ag reference electrode, and Pt wire counter electrode.

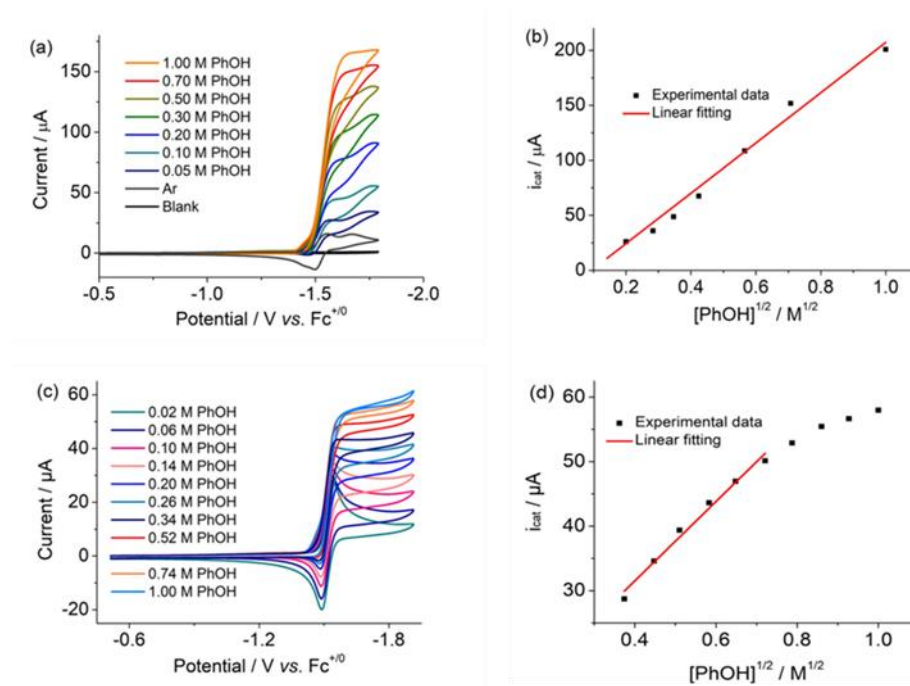

Figure S 17 (a) CVs show 0.5 mM **1p** with varied amounts of PhOH under CO<sub>2</sub>. (b) The linear dependence of catalytic Current ( $i_{cat}$ ) on the square root of the concentration of PhOH. (c) Cyclic voltammograms show 0.5 mM **2p** with varied amounts of PhOH under CO<sub>2</sub>. (d) The linear dependence of catalytic Current ( $i_{cat}$ ) on the square root of the concentration of PhOH. Voltammograms are taken at a scan rate of 100 mV/s with 0.1 M <sup>n</sup>Bu<sub>4</sub>NPF<sub>6</sub> in MeCN solution. Glassy carbon working electrode, Ag<sup>+</sup>/Ag reference electrode, and Pt wire counter electrode.

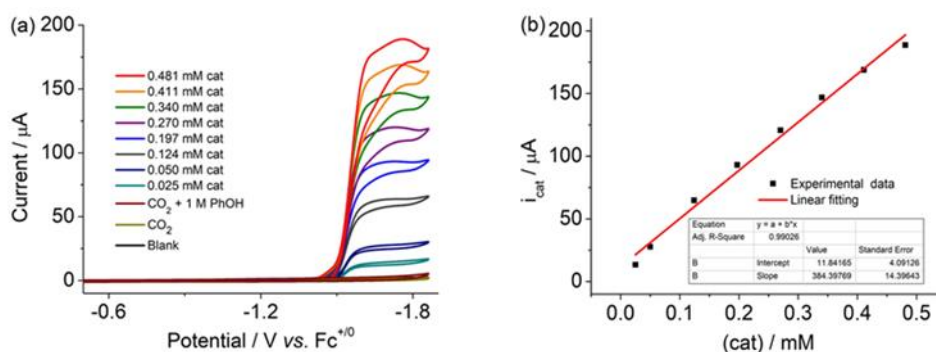

Figure S 18 (a) CVs of **1p** (0–0.481 mM) in the presence of 1 M PhOH under CO<sub>2</sub>. (b) The linear dependence of catalytic Current ( $i_{\text{cat}}$ ) on the concentration of the catalyst. Voltammograms are taken at a scan rate of 100 mV/s with 0.1 M <sup>n</sup>Bu<sub>4</sub>NPF<sub>6</sub> in MeCN solution. Glassy carbon working electrode, Ag<sup>+</sup>/Ag reference electrode, and Pt wire counter electrode

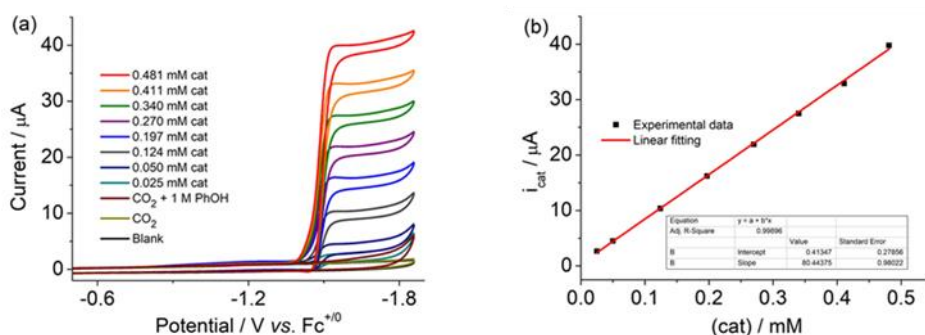

Figure S 19 (a) CVs of **2p** (0–0.481 mM) in the presence of 1 M PhOH under CO<sub>2</sub>. (b) The linear dependence of catalytic Current ( $i_{\text{cat}}$ ) on the concentration of the catalyst. Voltammograms are taken at a scan rate of 100 mV/s with 0.1 M <sup>n</sup>Bu<sub>4</sub>NPF<sub>6</sub> in MeCN solution. Glassy carbon working electrode, Ag<sup>+</sup>/Ag reference electrode, and Pt wire counter electrode.



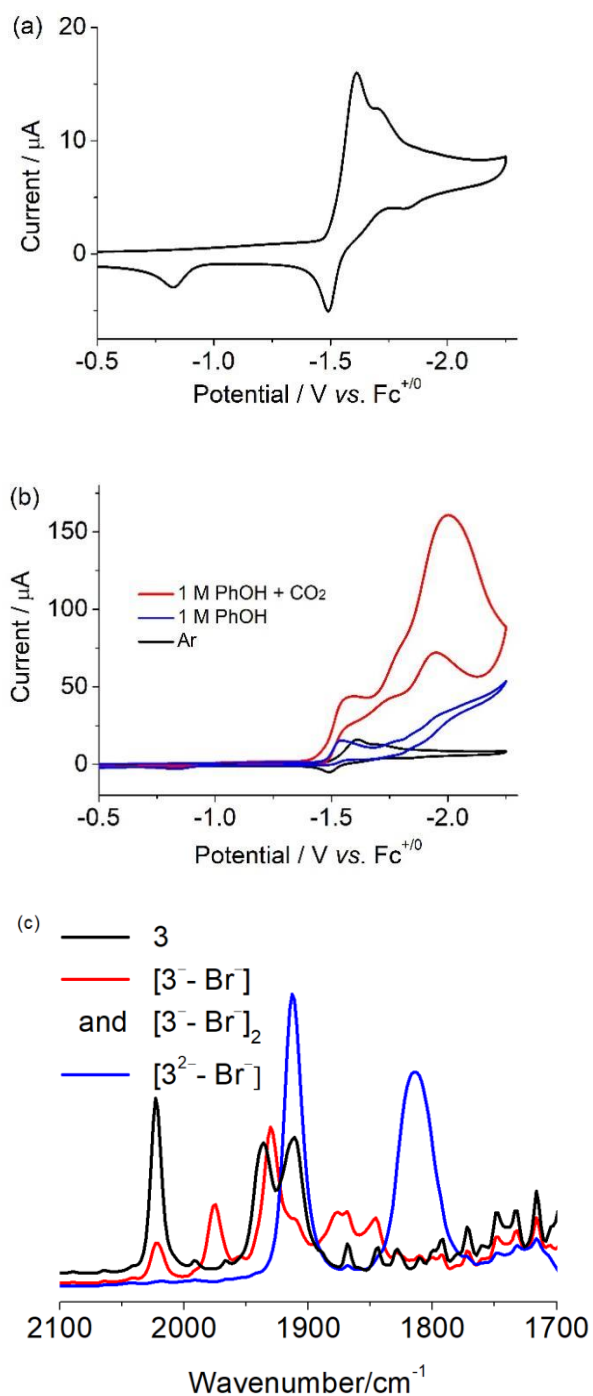

Figure S 20 (a) Cyclic voltammogram show **3** (0.5 mM) under Ar with a scan rate of 100 mV/s. (b) CVs of 0.5 mM **3** under Ar (black), in the presence of 1 mM phenol (blue) and saturated with  $\text{CO}_2$  in the presence of 1 M phenol (red). Voltammograms are taken at a scan rate of 100 mV/s with 0.1 M  $n\text{Bu}_4\text{NPF}_6$  in MeCN solution. Glassy carbon working electrode,  $\text{Ag}^+/\text{Ag}$  reference electrode, and Pt wire counter electrode. (c) IR-SEC of a 1mM solution of **3** in MeCN under Ar. Reduction at the potential corresponding to the first peak current.

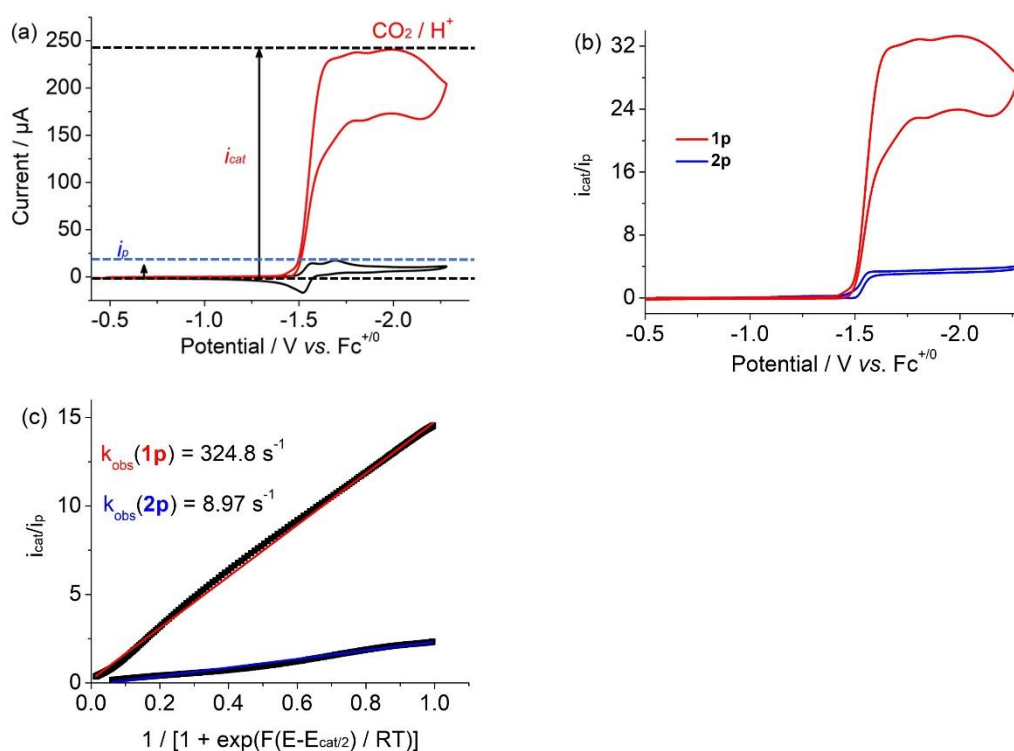

Figure S 21 (a) CVs of 0.5 mM **1p** under Ar in the absence of phenol (black line), under CO<sub>2</sub> in the presence of 1 M phenol (red line). Voltammograms are taken at a scan rate of 100 mV/s with 0.1 M <sup>n</sup>Bu<sub>4</sub>NPF<sub>6</sub> in MeCN solution. (b) Cyclic voltammetry of **1p** (red line) and **2p** (blue line) in the potential domain of the catalytic CO<sub>2</sub> reduction wave in acetonitrile + 0.1 M <sup>n</sup>Bu<sub>4</sub>NPF<sub>6</sub> + 1 M PhOH, at 0.1 V/s under 1 atm. CO<sub>2</sub> (catalyst concentration is 0.5 mM). The current, *i<sub>cat</sub>* is normalized against the peak current of the reversible one-electron reversible wave, *i<sub>p</sub>* obtained at the same scan rate (0.1 V/s). (c) Foot-of-the-wave analysis of **1p** and **2p** under equivalent experimental conditions with a linear fit extrapolated from (*E* - *E<sub>cat</sub>*) at a scan rates of 0.1 V/s.

### Details for Foot-of-the-Wave Analysis (FOWA) and determination of *k<sub>obs</sub>*.

Foot-of-the-Wave Analysis was applied to cyclic voltammetry measurements as described by Savéant and coworkers (*Science*, **2012**, *338* (6103), 90-94;) in order to determine *k<sub>obs</sub>* = TOF under the specified conditions. At the outset of each experiment, a cyclic voltammogram was measured of catalyst alone under inert atmosphere in the presence of proton source, from which *E<sub>cat</sub>*<sup>0</sup> could be determined. The half of the peak height of the formal **1p**/(**1p**<sup>2-</sup> - Br<sup>-</sup>) couple, *i<sub>p</sub>*<sup>0</sup>, was determined by taking the difference between peak cathodic current and baseline current before this couple.

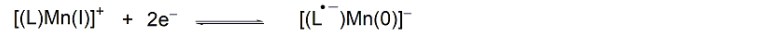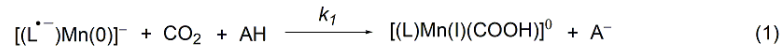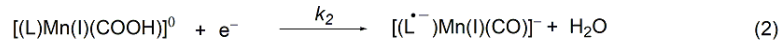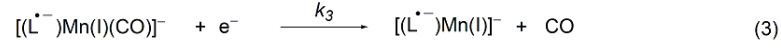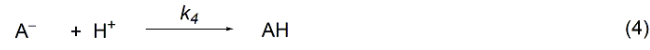

$$k_1 \gg k_3 \gg k_2$$

$$k_4 \gg k_2$$

The rate-determine step (2) for CO<sub>2</sub> reduction with complex **1p** (or **2p**) may be described as an EC process, involving one electron transfer followed by C-OH bond cleavage. The following relationship may be derived:

$$\frac{i}{i_p^0} = \frac{2.24 \sqrt{\frac{k_{obs}}{fv}}}{1 + e^{[f(E-E_{cat}^0)]}}$$

where  $i$  is the catalytic current,  $E$  is the potential,  $v$  is the scan rate (V/s),  $k_{obs}$  is the observed rate constant, and  $f = F/RT = 38.94 \text{ V}^{-1}$ . Thus, a “FOW” plot of  $\frac{i}{i_p^0}$  versus  $\frac{1}{1 + e^{[f(E-E_{cat}^0)]}}$  yields a straight line with slope  $2.24 \sqrt{\frac{k_{obs}}{fv}}$ , from which  $k_{obs}$  may be determined.

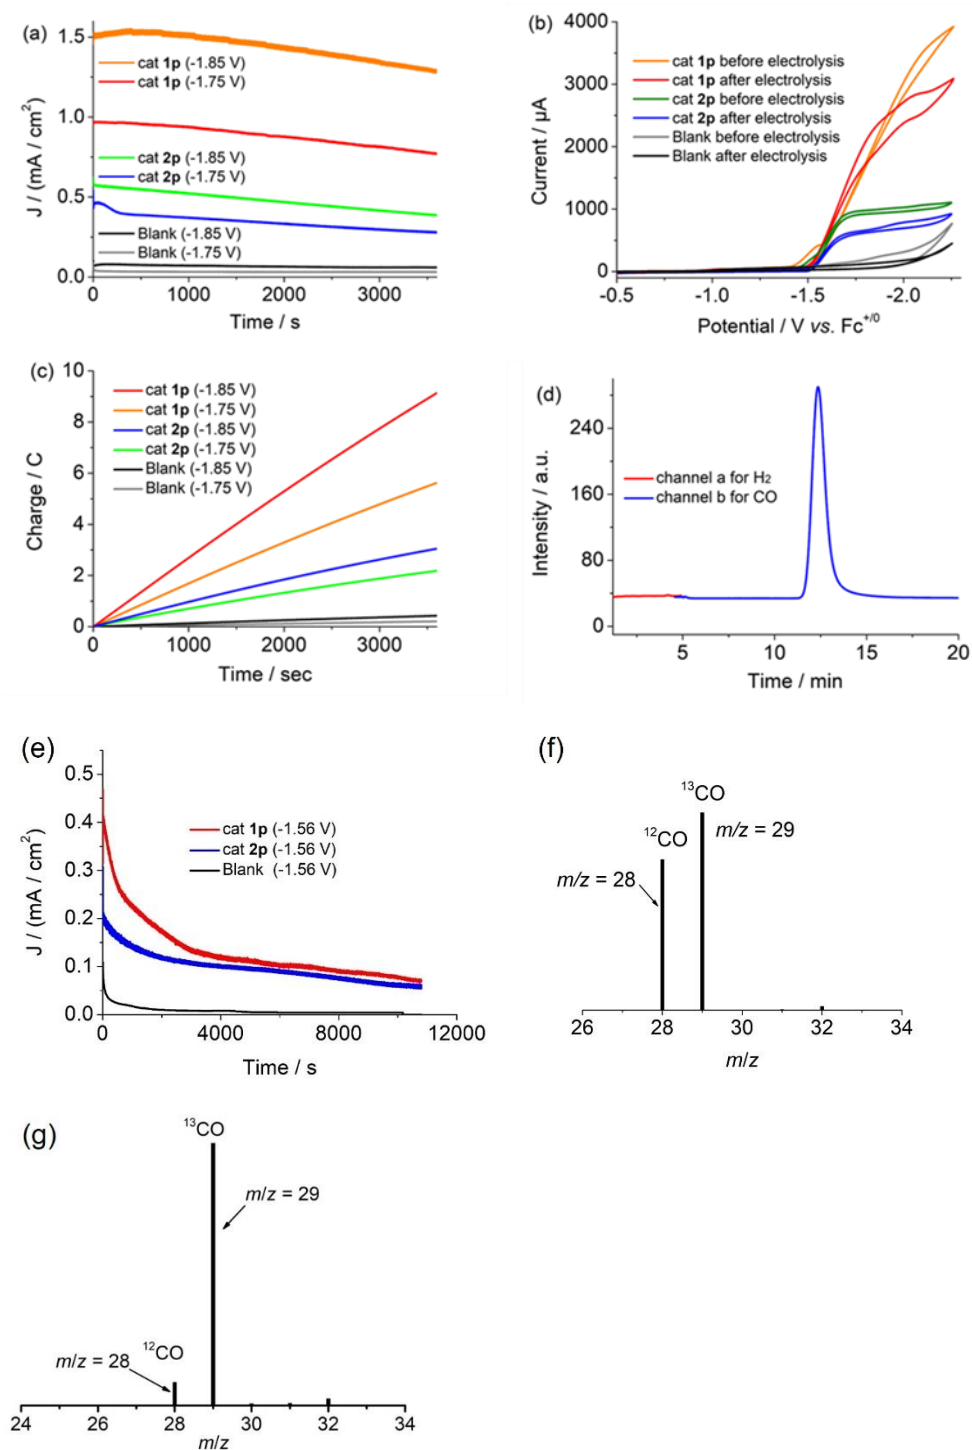

Figure S 22 (a) Controlled potential electrolysis at -1.75 V and -1.85 V vs. Fc<sup>+0</sup> in the presence and absence of 0.5 mM **1p** (or **2p**) under CO<sub>2</sub> in the presence of 1 M phenol. (b) Cyclic voltammograms show 0.5 mM **1p** and **2p** before and after electrolysis at -1.85 V vs. Fc<sup>+0</sup> under CO<sub>2</sub> in the presence of 1 M phenol. (c) The charge integration after electrolysis for **1p** and **2p** (d) The gas products channel of **1p**. (e) Controlled potential electrolysis at -1.56 V vs. Fc<sup>+0</sup> under CO<sub>2</sub> in the presence of

1 M phenol in the presence and absence of 0.5 mM **1p** (or **2p**). (f) Mass spectrum of the gaseous phase resulting from electrolysis of the  $^{13}\text{CO}_2$  saturated solution containing 0.5 mM **1p** at  $-1.85$  V over 0.5 h and (g) 1 h. Conditions: 0.1 M TBAPF<sub>6</sub> in CH<sub>3</sub>CN with 1 M phenol, glassy carbon working electrode, graphite rod counter electrode, Ag<sup>+</sup>/Ag reference electrode. Voltammograms are taken at a scan rate of 100 mV/s with 0.1 M <sup>n</sup>Bu<sub>4</sub>NPF<sub>6</sub> in MeCN solution. Glassy carbon working electrode, Ag<sup>+</sup>/Ag reference electrode, and Pt wire counter electrode.

Detail discussion in comparable **controlled potential electrolysis (CPE)** results of complexes **1p** and **2p**

Comparable controlled potential electrolysis (CPE) studies of complexes **1p** and **2p** were explored under CO<sub>2</sub> atmosphere in the presence of 1.0 M phenol at varied potentials with a custom cell designed in our laboratory. At an applied potential of  $-1.85$  V, an average electrocatalytic current of 1.4 mA/cm<sup>2</sup> was observed for **1p** in a period of 1 h (Figures S21). CVs following the electrolysis indicated a slight decay in the amplitude of catalytic current (Figures S22), consistent with the observation that a decrease in the catalytic current during CPE. Since the formation of catalytic active nanoparticles were excluded by the negligible current observed after a “rinse test” following CPE, the current decay was assumed to be a result of catalyst decomposition. Analysis of the gas mixture in the headspace of the working compartment by GC confirmed CO as the main production and a trace amount of H<sub>2</sub>. Analysis of the liquid phase by ion chromatography detected no other transformed product. In addition, negligible CO amounts were found in the headspace of the counter electrode compartment. Control experiments showed that only negligible current densities and trace amount of CO were produced in the absence of **1** (Figure S22). Finally, a total *Faradaic Efficiency (FE)* for CO and H<sub>2</sub> of  $100 \pm 2\%$  and a *Turnover Numbers (TON, mol (CO+H<sub>2</sub>)/mol cat)* of 11.83 based on **1p** were obtained (Table S5). At the same cathodic applied potential, complex **2p** only produced a low current of 0.3 mA/cm<sup>2</sup> with the *TON* value for CO production sharply decreasing to 2.1 (Figure S22). The electrocatalytic properties of **1p** and **2p** summarized in table S5 indicates a notable effect of the proton tunneling distance on CO<sub>2</sub> reduction. Controlled potential electrolysis at  $-1.56$  V (Figure S22e), neither the charge nor the *TON* for both

complexes is significantly lower than that at  $-1.85$  V, owing to the weaker driving force for electrochemical reduction of  $\text{CO}_2$ . Isotope labelling experiment with  $^{13}\text{CO}_2$  is really hard to exclude the carbon source of CO is  $\text{CO}_2$  (Figure S22f), especially for a system which might release CO from itself. However, extend the electrolysis time would lead to obviously increase in the ratio of  $^{13}\text{CO}$  (Figure S22g), support the conversion of  $\text{CO}_2$  to CO.

Table S 4 Quantitative analysis of the CPE results of **1p** and **2p**

| Complex                           | <b>1p</b> | <b>1p</b> | <b>1p</b> | <b>2p</b> | <b>2p</b>  | <b>2p</b> | Blank   | Blank    | Blank |
|-----------------------------------|-----------|-----------|-----------|-----------|------------|-----------|---------|----------|-------|
| Proton source (1 M)               | PhOH      | PhOH      | PhOH      | PhOH      | PhOH       | PhOH      | PhOH    | PhOH     | PhOH  |
| Potential/V vs. Fc <sup>+0</sup>  | -1.85     | -1.75     | -1.56     | -1.85     | -1.75      | -1.56     | -1.85   | -1.75    | -1.56 |
| Q / C                             | 9.135     | 5.622     | 1.412     | 3.049     | 2.184      | 1.046     | 0.427   | 0.207    | 0.088 |
| n <sub>H2</sub> : n <sub>CO</sub> | 1.3: 99.2 | 0.7:99.5  | 0.9: 138  | 0 : 100   | 0.3 : 99.5 | 1.4 : 110 | 4.2 : 0 | 12.5 : 0 | 0     |
| TON                               | 11.83     | 2.1       | 1.45      | 2.5       | 1.73       | 0.49      | /       | /        | /     |
| Faradaic efficiencies             | 95.3      | 96.3      | 93.7      | 85.9      | 90.5       | 91.6      |         |          |       |

Table S 5 Comparison of the electrocatalytic properties of complex **1p**, **2p**.

| Complex   | Proton source (1 M) | E <sub>1/2</sub> (V) vs. Fc <sup>+0</sup> | i <sub>cat</sub> /i <sub>p</sub> | TOF <sub>max</sub> (s <sup>-1</sup> ) | η(V) vs. Fc <sup>+0</sup> | TON |
|-----------|---------------------|-------------------------------------------|----------------------------------|---------------------------------------|---------------------------|-----|
| <b>1p</b> | PhOH                | -1.56                                     | 16.6                             | 325                                   | 0.21                      | 10  |
| <b>2p</b> | PhOH                | -1.52                                     | 1.7                              | 9 <sup>a</sup> /10.48 <sup>b</sup>    | 0.17                      | 2   |

a, obtained by foot-of-the-wave analysis (FOWA). b, obtained by the catalytic plateau current analysis.

## 11. DFT Calculations

### Computational Details.

All geometry optimizations were obtained from density functional theory with the M06 exchange-correlation functional<sup>1</sup> computations as implemented in Gaussian 09<sup>2</sup>. Nonmetals (C, H, O, N) used 6-31G(d,p) basis set<sup>3,4</sup> and SDD<sup>5</sup> was used for Mn. The single point energies of optimized structures were calculated at M06/[6-311++G(d,p)+SDD] level. Harmonic vibrational frequencies were computed at the same level to obtain the entropic corrections and to verify the nature of stationary points. All geometric structure optimizations, vibrational frequency calculations and single point energy calculations were obtained in acetonitrile solvent using the polarizable continuum model (CPCM)<sup>6,7</sup>. The effectiveness of our computational method has been demonstrated by our previous studies to successfully reproduce the experimental reduction potentials and CO stretching bands.<sup>8-10</sup>

The reduction potential  $E_{O|R}$  relative to the ferrocene/ferrocenium couple was calculated using the following formula:

$$E_{O|R} = -\frac{\Delta G_{O|R}}{nF} - E_{SCE}^{ref} - 0.384V$$

$\Delta G$  is the total Gibbs free energy;  $n$  is the number of electrons involved in the electrochemistry reaction.  $F$  is Faraday's constant.  $E_{SCE}^{ref}$  is taken as  $-4.422$  V<sup>11</sup>, which is the absolute potential of saturated calomel electrode (SCE) in acetonitrile solution.  $-0.384$  V is the shift value of reduction potential for ferrocene/ferrocenium couple relative to SCE.<sup>12</sup> For the reactions involving the participation of electrons, the energy contributions due to the negative reductive potential were added to all the species after each electronreduction step.

Refs

[1] Zhao, Y.; Truhlar, D. G. The M06 suite of density functionals for main group thermochemistry, thermochemical kinetics, noncovalent interactions, excited states, and transition elements: two new functionals and systematic testing of four M06-class functionals and 12 other functionals.



*Theor. Chem. Acc.* **2008**, 120, 215-241.

- [2] Frisch, M. J.; Trucks, G. W.; Schlegel, H. B.; Scuseria, G. E.; Robb, M. A.; Cheeseman, J. R.; Scalmani, G.; Barone, V.; Mennucci, B.; Petersson, G. A.; Nakatsuji, H.; Caricato, M.; Li, X.; Hratchian, H. P.; Izmaylov, A. F.; Bloino, J.; Zheng, G.; Sonnenberg, J. L.; Hada, M.; Ehara, M.; Toyota, K.; Fukuda, R.; Hasegawa, J.; Ishida, M.; Nakajima, T.; Honda, Y.; Kitao, O.; Nakai, H.; Vreven, T.; Montgomery, J. J. A.; Peralta, J. E.; Ogliaro, F.; Bearpark, M.; Heyd, J. J.; Brothers, E.; Kudin, K. N.; Staroverov, V. N.; Kobayashi, R.; Normand, J.; Raghavachari, K.; Rendell, A.; Burant, J. C.; Iyengar, S. S.; Tomasi, J.; Cossi, M.; Rega, N.; Millam, J. M.; Klene, M.; Knox, J. E.; Cross, J. B.; Bakken, V.; Adamo, C.; Jaramillo, J.; Gomperts, R.; Stratmann, R. E.; Yazyev, O.; Austin, A. J.; Cammi, R.; Pomelli, C.; Ochterski, J. W.; Martin, R. L.; Morokuma, K.; Zakrzewski, V. G.; Voth, G. A.; Salvador, P.; Dannenberg, J. J.; Dapprich, S.; Daniels, A. D.; Farkas; Foresman, J. B.; Ortiz, J. V.; Cioslowski, J.; Fox, D. J. Gaussian 09, Revision D.01; Gaussian, Inc.: Wallingford, CT, **2009**.
- [3] Hehre, W. J.; Ditchfield, R.; Pople, J. A. Self-consistent molecular orbital methods. XII. Further extensions of gaussian-type basis sets for use in molecular orbital studies of organic molecules. *J. Chem. Phys.* **1972**, 56, 2257-2261.
- [4] Hariharan, P. C.; Pople, J. A. The influence of polarization functions on molecular orbital hydrogenation energies. *Theor. Chim. Acta.* **1973**, 28, 213-222.
- [5] Dolg M.; Wedig U.; Stoll H.; Preuss H. Energy-adjusted ab initio pseudopotentials for the first row transition elements. *J. Chem. Phys.* **1987**, 86, 866-872.
- [6] Barone V.; Cossi M. Quantum calculation of molecular energies and energy gradients in solution by a conductor solvent model. *J. Phys. Chem. A* **1998**, 102, 1995-2001.
- [7] Cossi M.; Rega N.; Scalmani G.; Barone V. Energies, structures, and electronic properties of molecules in solution with the C-PCM solvation model. *J. Comp. Chem.* **2003**, 24, 669-681.
- [8] He S.; Huang F.; Wu Q.; Zhang P.; Xiong Y.; Yang J.; Zhang R.; Wang F.; Chen L.; Liu T. L.; Li F. Multiple-Site Concerted Proton-Electron Transfer in a ManganeseBased Complete Functional Model for [FeFe]-Hydrogenase. *Angew. Chem. Int. Ed.* **2021**, 60, 25839-25845.

- [9] Yang J.; He S.; Wu Q.; Zhang P.; Chen L.;Huang F.; and Li F. A bio-inspired mononuclear manganese catalyst for high-rate electrochemical hydrogen production. *Dalton Trans.* **2021**, 50, 4783-4788.
- [10] Wu Q.; Li M.; He S.; Xiong Y.; Zhang P.; Huang H.; Chen L.;Huang F.; and Li F. The hangman effect boosts hydrogen production by a manganese terpyridine complex. *Chem. Commun.* **2022**, 58, 5128-5131.
- [11] Isse A. A.; Gennaro A. Absolute potential of the standard hydrogen electrode and the problem of interconversion of potentials in different solvents. *J. Phys. Chem. B* **2010**, 114, 7894-7899.
- [12] Ngo K. T.; McKinnon M.; Mahanti B.; Narayanan R.; Grills D. C.; Ertem M. Z.; Rochford J. Turning on the protonation-first pathway for electrocatalytic CO<sub>2</sub> reduction by manganese bipyridyl tricarbonyl complexes. *J. Am. Chem. Soc.* **2017**, 139, 2604-2618.

Table S6 Selected experimental and calculated  $\nu_{CO}$  for the proposed intermediates in pure MeCN

| Complexes                           | Experimental / cm <sup>-1</sup> | DFT / cm <sup>-1</sup> |
|-------------------------------------|---------------------------------|------------------------|
| <b>1</b>                            | 1927, 1856                      | 1925, 1865,            |
| [1 <sup>2-</sup> -Br <sup>-</sup> ] | 1841, 1777                      | 1848, 1790             |
| <b>2</b>                            | 1927, 1856,                     | 1923, 1865             |
| [2 <sup>2-</sup> -Br <sup>-</sup> ] | 1841, 1777                      | 1846, 1790             |

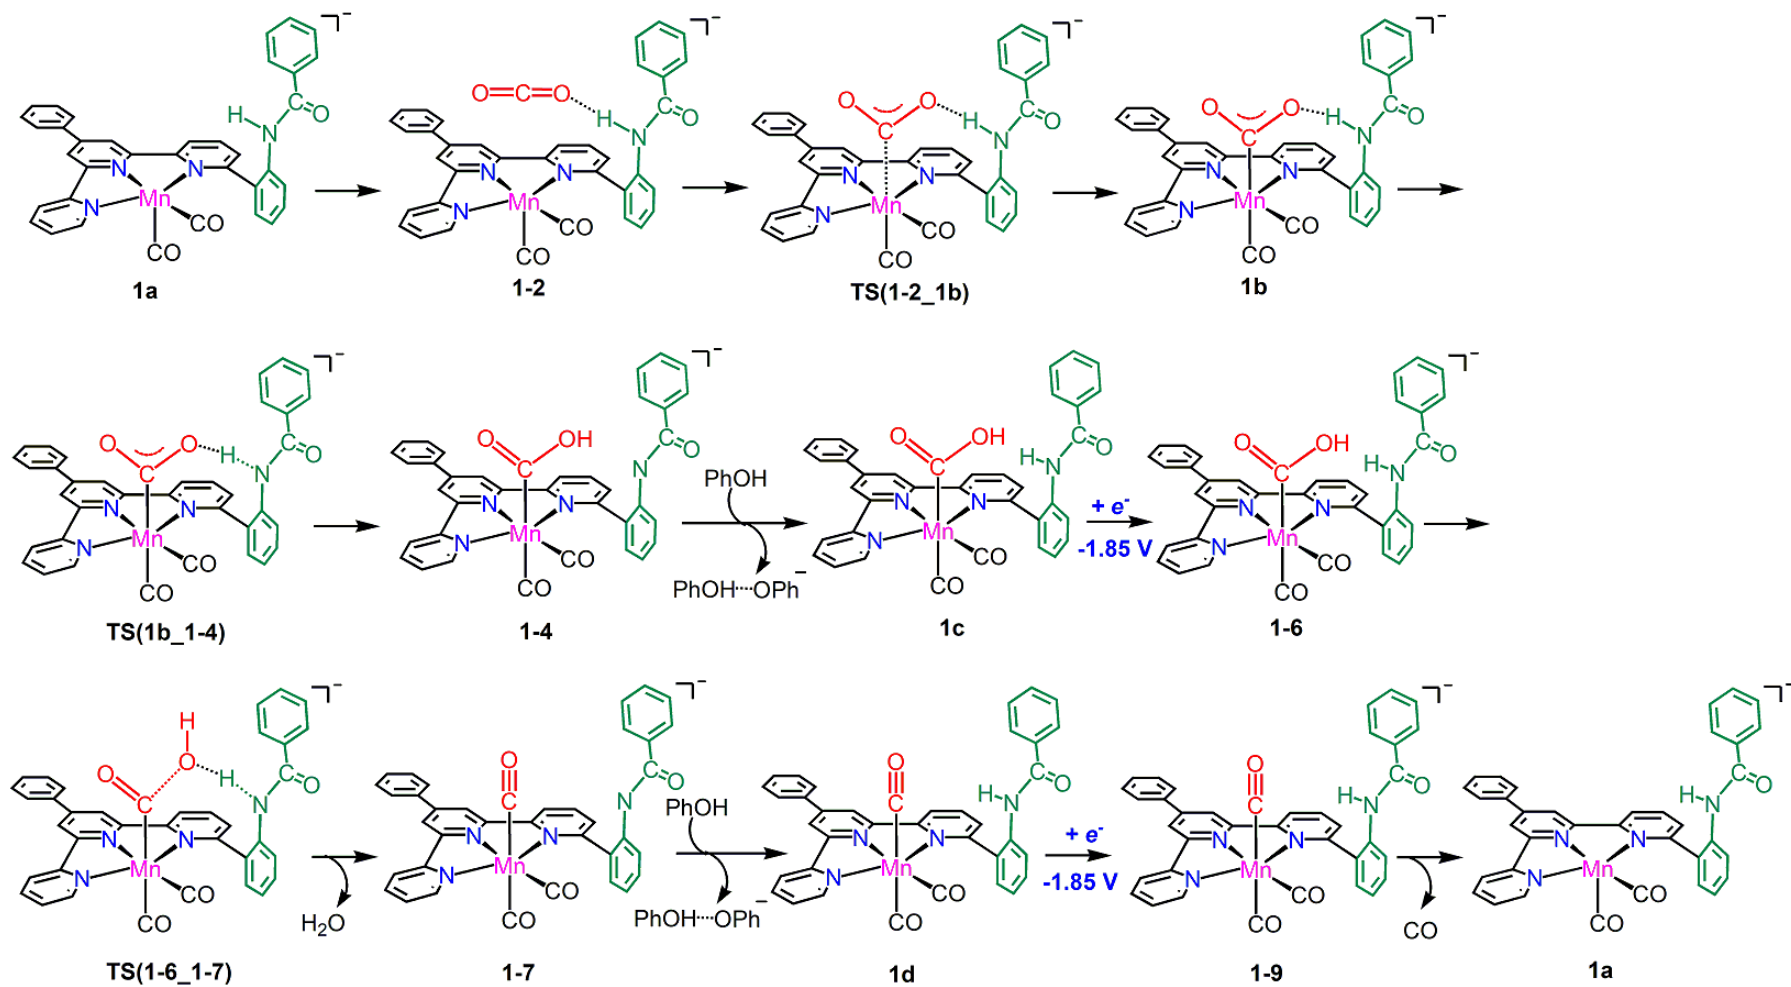

Scheme S 7 Speculative electrocatalytic cycle for the reduction of CO<sub>2</sub> to CO mediated by [1<sup>2-</sup>-Br<sup>-</sup>] (**1a**) or [2<sup>2-</sup>-Br<sup>-</sup>] (**2a**) at -1.85 V vs Fc<sup>+0</sup>.

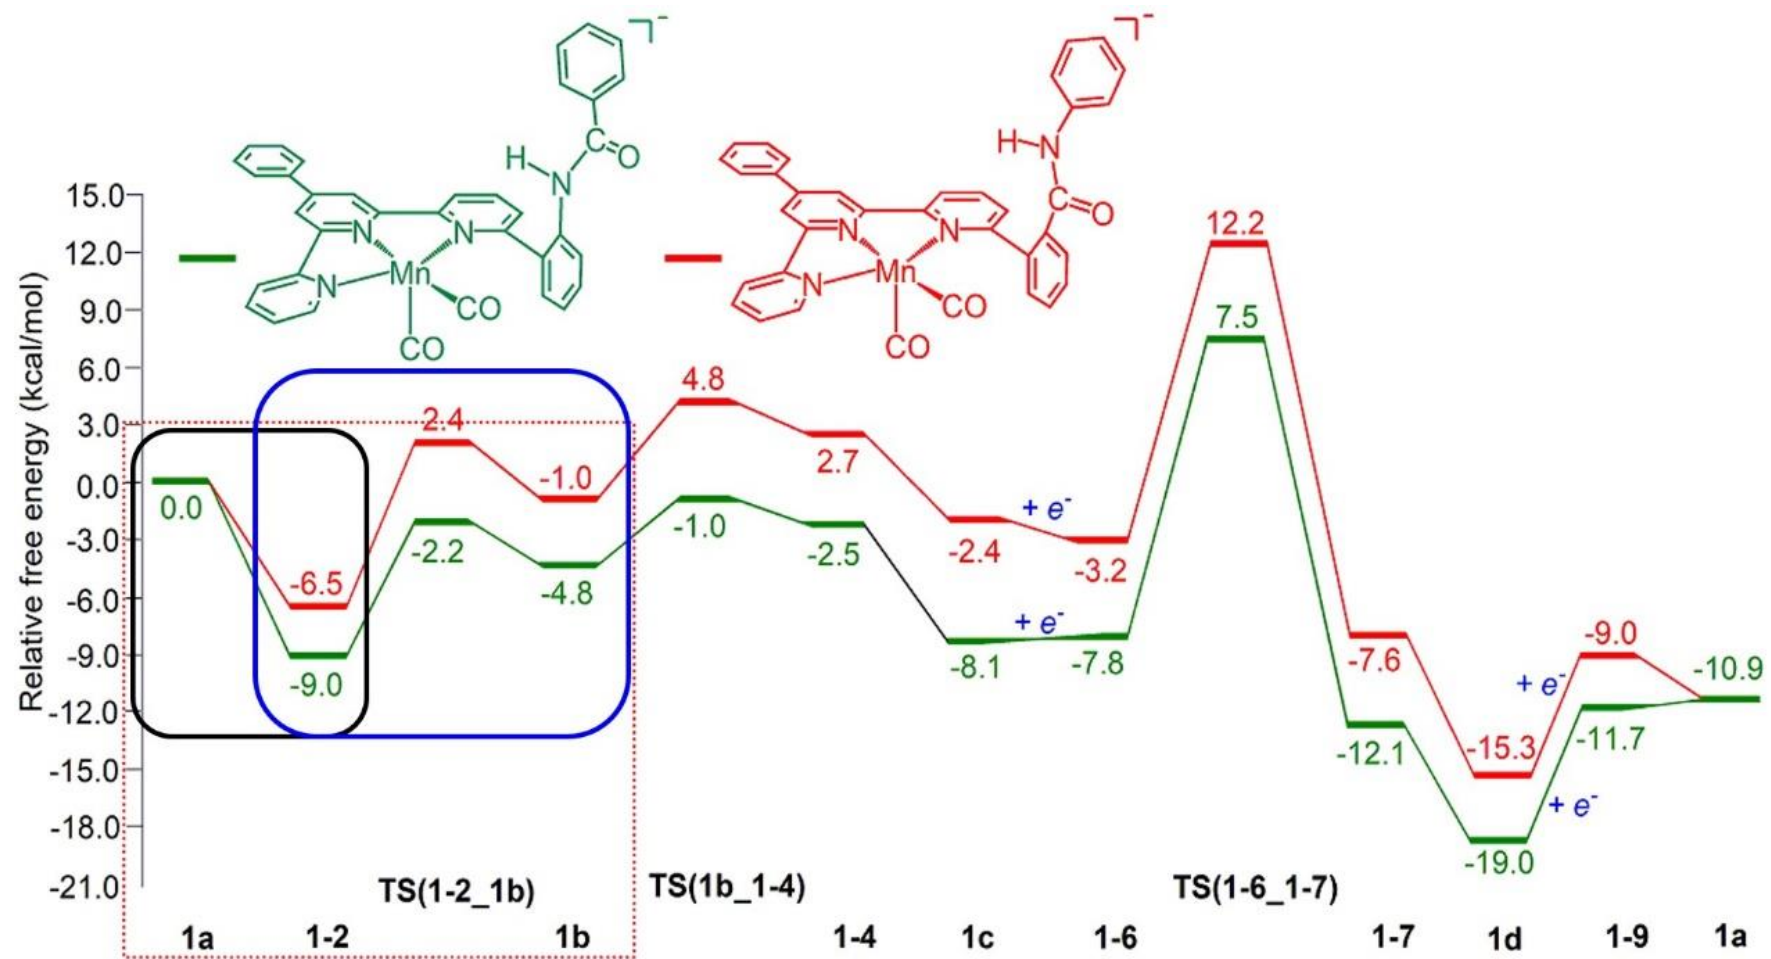

Figure S 23 Gibbs free energy (kcal mol<sup>-1</sup>) profile for the electrochemical reduction of CO<sub>2</sub> to CO catalyzed by **1** (green line) or **2** (red line) at -1.85 V vs *Fc*<sup>+0</sup>.

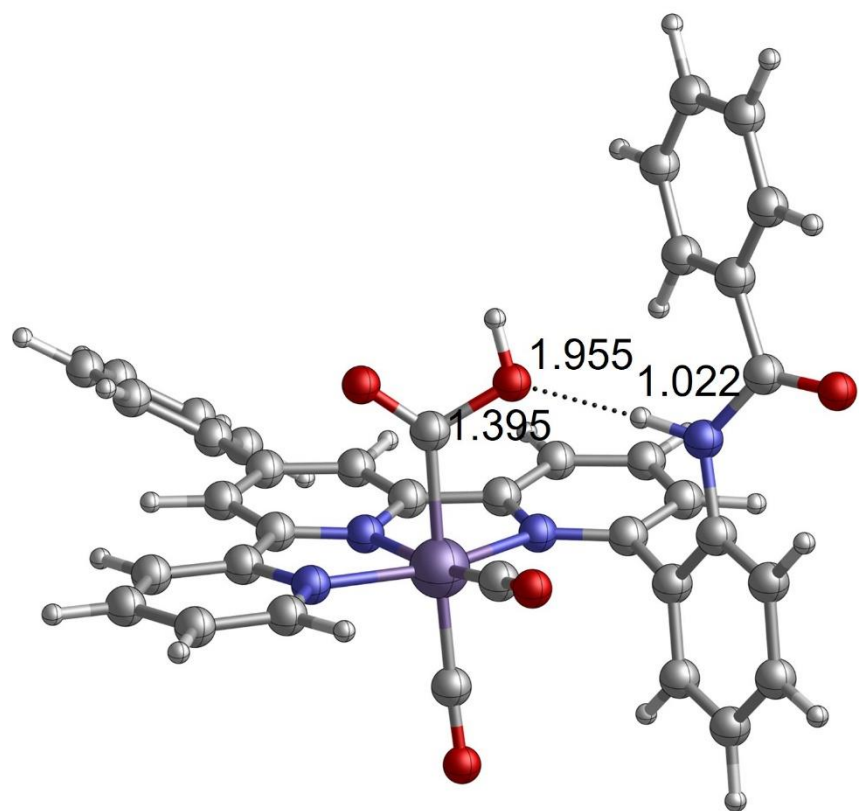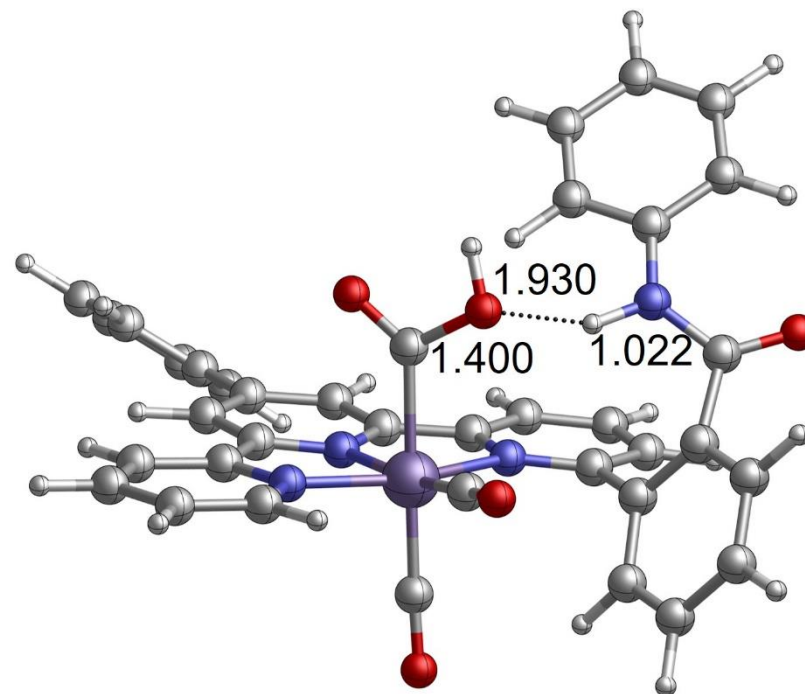

Figure S 24 Optimized geometries of 1-6 and 2-6 for the proton tunneling distance for C-OH bond cleavage. Bond lengths are shown in Angstroms.

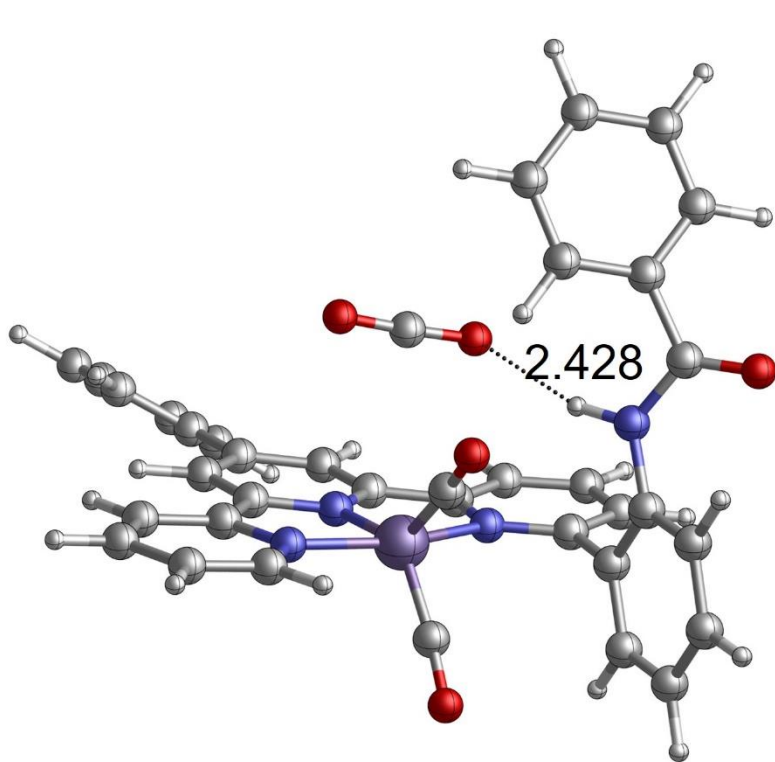

**1-2**

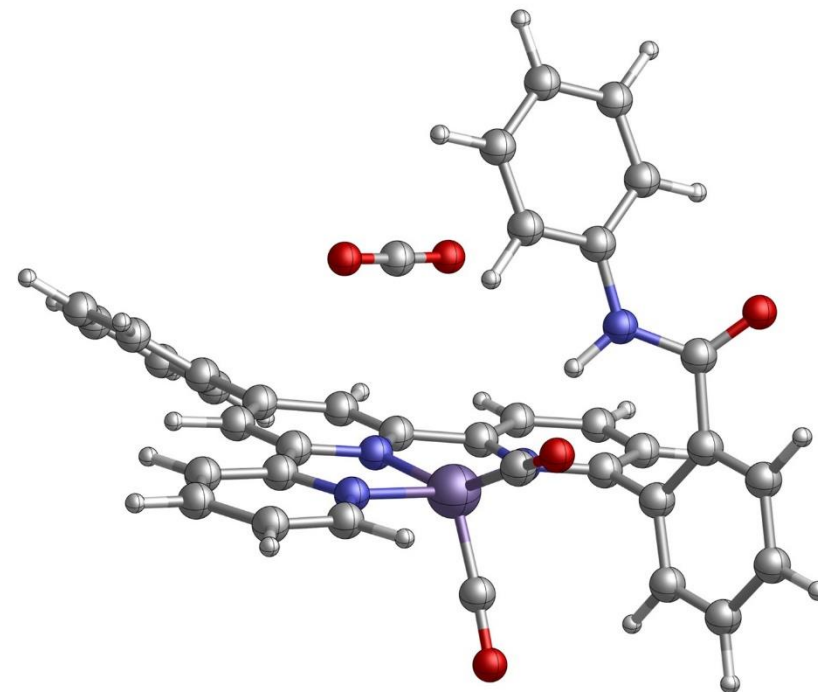

**2-2**

Figure S 25 Optimized geometries of 1-2 and 2-2 for the proton tunneling distance for CO<sub>2</sub> binding. Bond lengths are shown in Angstroms.

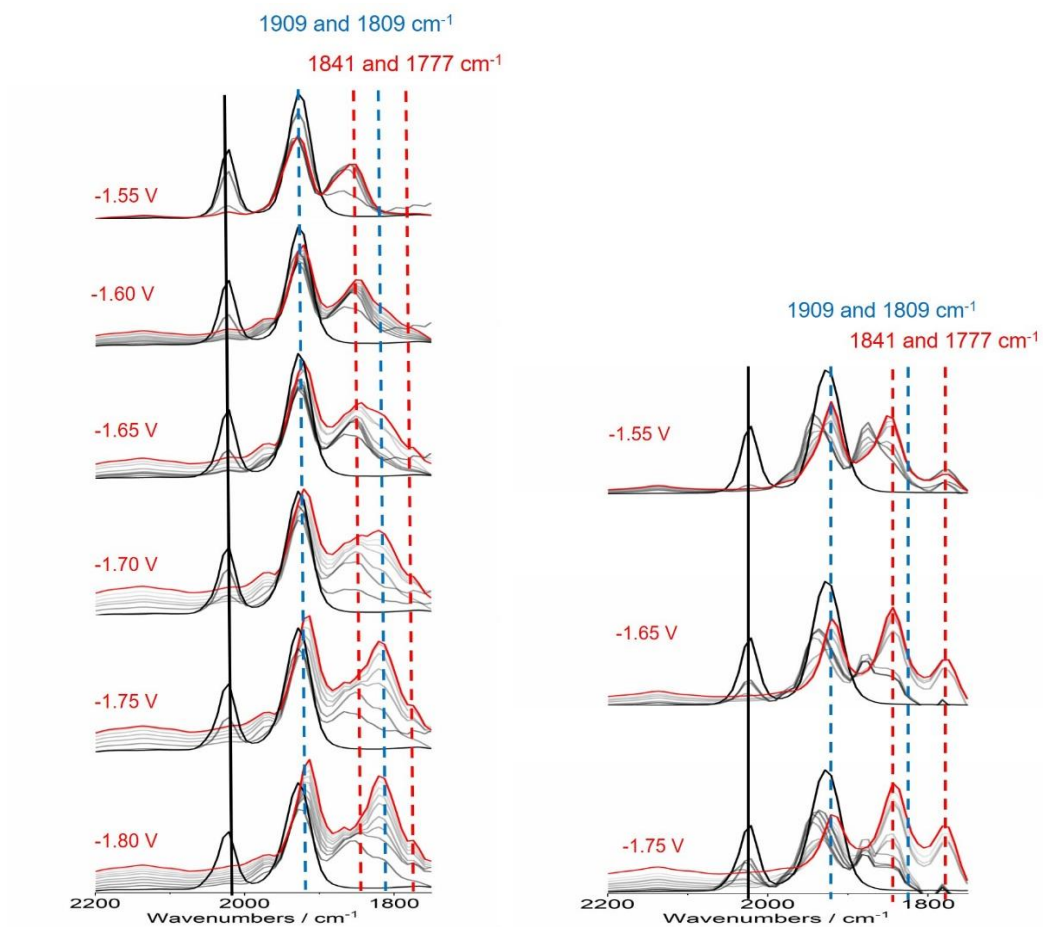

Figure S26 IR-SEC of 0.5 mM **1p** (left) and **2p** (left) in the presence of 0.5 M phenol under CO<sub>2</sub> atmosphere with varied electrolysis potential. The resting species **1p** (or **2p**) (black line), the final species after electrolysis at an applied electrolysis potential (red line).

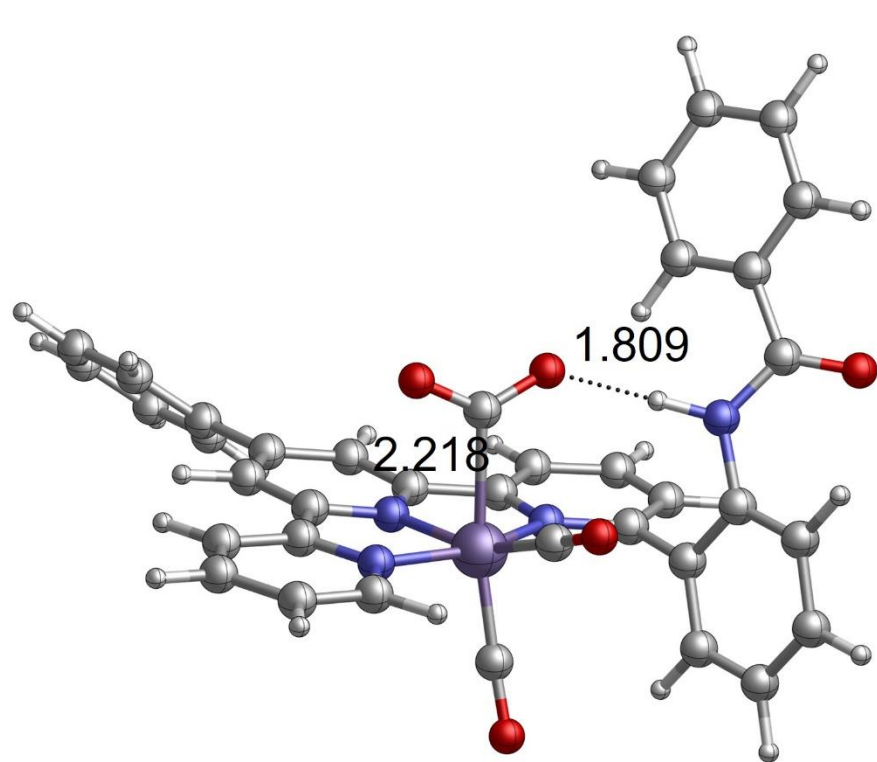

**1b**

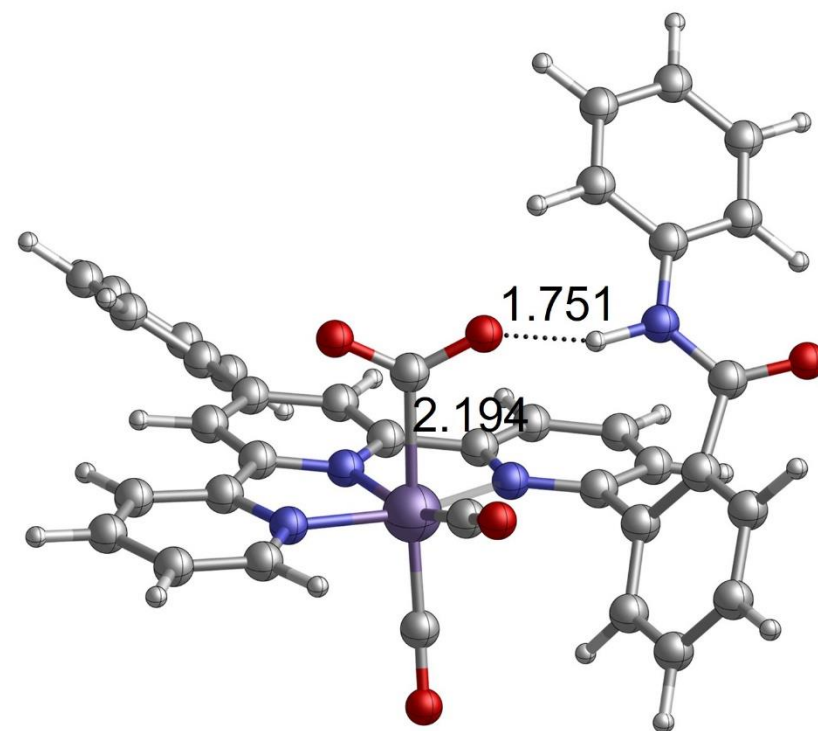

**2b**

Figure S 27 Optimized geometries of **1b** and **2b** for the interaction of the bound CO<sub>2</sub> molecule with intramolecular amide. Bond lengths are shown in Angstroms.
